# Supplementary material for: Multi-Modal Proteomic Analysis of Retinal Protein Expression Alterations in a Rat Model of Diabetic Retinopathy
Source: PLoS One. 2011 Jan 13;6(1):e16271. doi: 10.1371/journal.pone.0016271 (PMC3020973; doi:10.1371/journal.pone.0016271)
Supplement: Table S1 — Primary data from Luminex analysis (XLS) [file pone.0016271.s003.xls]

## Sheet: Sheet1
		Apo A1 (Apolipoprotein A1)	CRP (C Reactive Protein)	EGF (Epidermal Growth Factor)	Endothelin-1	Eotaxin	Factor VII	FGF-9 (Fibroblast Growth Factor-9)	FGF-basic (Fibroblast Growth Factor-basic)	Fibrinogen	GCP-2 (Granulocyte Chemotactic Protein-2)	GM-CSF (Granulocyte Macrophage-Colony Stimulating Factor)	Haptoglobin	IFN-gamma (Interferon-gamma)	IgA (Immunoglobulin A)	IL-10 (Interleukin-10)	IL-12p70 (Interleukin-12p70)	IL-17 (Interleukin-17)	IL-18 (Interleukin-18)	IL-1alpha (Interleukin-1alpha)	IL-1beta (Interleukin-1beta)	IL-2 (Interleukin-2)	IL-3 (Interleukin-3)	IL-4 (Interleukin-4)	IL-6 (Interleukin-6)	IL-7 (Interleukin-7)	IP-10 (Inducible Protein-10)	LIF (Leukemia Inhibitory Factor)	Lymphotactin	MCP-3 (Monocyte Chemoattractant Protein-3)	M-CSF (Macrophage-Colony Stimulating Factor)	MIP-1alpha (Macrophage Inflammatory Protein-1alpha)	MIP-1beta (Macrophage Inflammatory Protein-1beta)	MIP-1gamma (Macrophage Inflammatory Protein-1gamma)	MIP-2 (Macrophage Inflammatory Protein-2)	MIP-3beta (Macrophage Inflammatory Protein-3beta)	Myoglobin	OSM (Oncostatin M)	RANTES (Regulation Upon Activation, Normal T-Cell Expressed and Secreted)	SAP (Serum Amyloid P)	SCF (Stem Cell Factor)	SGOT (Serum Glutamic-Oxaloacetic Transaminase)	TIMP-1 (Tissue Inhibitor of Metalloproteinase Type-1)	Tissue Factor	TNF-alpha (Tumor Necrosis Factor-alpha)	TPO (Thrombopoietin)	VEGF (Vascular Endothelial Cell Growth Factor)
	Units	ug/mL	ug/mL	pg/mL	pg/mL	pg/mL	ng/mL	ng/mL	ng/mL	ug/mL	ng/mL	pg/mL	ug/mL	pg/mL	ug/mL	pg/mL	ng/mL	ng/mL	ng/mL	pg/mL	ng/mL	pg/mL	pg/mL	pg/mL	pg/mL	ng/mL	pg/mL	pg/mL	pg/mL	pg/mL	ng/mL	ng/mL	pg/mL	ng/mL	pg/mL	ng/mL	ng/mL	ng/mL	pg/mL	ug/mL	pg/mL	ug/mL	ng/mL	ng/mL	ng/mL	ng/mL	pg/mL
Diabetic	Average	0.07093	0.1375	4.512	12.404	1.494	0.9597	0.6399	13.967	6.241	0.002337	0.2996	0.5038	1.836	0.12213	186.5	0.04603	0.006958	0.2812	72.96	0.33552	21.81	0.6311	11.7	1.136	0.012993	5.111	40.29	4.445	1.8	0.00188111	0.0901125	5.876	0.00202933	0.713375	0.04563	0.3743	0.03334	0.3333	0.07677	34.99	27.82	0.05144	0.7975	0.0107989	1.18767	28.44
	SD	0.0157275	0.0331336	0.835594	3.35256	0.850464	0.13678	0.119456	4.32599	2.12746	0.000456729	0.0759359	0.106401	0.598335	0.0234543	23.8712	0.00868639	0.000766939	0.0833784	11.7	0.146223	4.79431	0.100648	1.33666	0.166392	0.00530447	0.943321	6.99134	1.0159	0.332532	0.000533747	0.0307082	2.95931	0.00114921	0.198125	0.011169	0.0850399	0.00377777	0.0528626	0.00734046	7.78795	5.7201	0.00254261	0.20543	0.00291256	0.46745	5.53096
Control	Average	0.0574778	0.117011	4.86778	11.7467	1.00575	0.891667	0.58	7.14333	5.98078	0.00249333	0.299222	0.328556	1.41375	0.116144	177.444	0.0441333	0.00839	0.278125	65.8778	0.37315	22.2833	0.579143	10.1656	1.228	0.0132811	4.60889	44.9	3.68222	1.64111	0.00166167	0.0659	6.1	0.00205429	0.793667	0.0440333	0.354222	0.0322667	0.298667	0.0714222	35.7222	25.3889	0.0506111	0.707778	0.012075	1.2792	28.9778
	SD	0.0119758	0.0290214	1.58066	4.90281	0.57845	0.221284	0.142086	4.46956	3.38376	0.201634	0.236091	0.163392	0.539529	0.184083	60.62	0.197016	0.0133454	0.250078	29.9443	0.143655	11.0211	0.170088	3.68538	0.360186	0.299102	1.71709	15.4952	1.30976	0.541943	0.169807	0.019154	2.13507	0.361974	0.409811	0.236799	0.0626904	0.15014	0.0758485	0.113384	12.8664	11.1064	0.177743	0.204074	0.124381	0.563229	10.0056
Ratio		1.23404	1.1751	0.926912	1.05596	1.48546	1.0763	1.10328	1.95525	1.04351	0.937299	1.00126	1.53338	1.29867	1.05154	1.05103	1.04298	0.829321	1.01106	1.10751	0.983225	0.978758	1.08971	1.15095	0.925081	0.978307	1.10894	0.897327	1.20715	1.09682	1.13206	1.36741	0.963279	0.987854	0.898835	1.03626	1.05668	1.03326	1.11596	1.07488	0.979502	1.09575	1.01638	1.12677	0.894318	0.928445	0.981442
T-test		0.0642018	0.158816	0.29236	0.699364	0.170674	0.275135	0.286993	0.00220321	0.826292	0.6073	0.989868	0.00399978	0.0904203	0.661151	0.401144	0.635089	0.0477957	0.946134	0.365594	0.571895	0.880218	0.420105	0.0282054	0.384532	0.90968	0.25585	0.0970906	0.0570531	0.29781	0.417617	0.0987467	0.836469	0.959591	0.622194	0.75439	0.516688	0.482018	0.27097	0.406246	0.855058	0.430162	0.583281	0.312776	0.36361	0.797961	0.813481
