# Supplementary material for: Multi-Modal Proteomic Analysis of Retinal Protein Expression Alterations in a Rat Model of Diabetic Retinopathy
Source: PLoS One. 2011 Jan 13;6(1):e16271. doi: 10.1371/journal.pone.0016271 (PMC3020973; doi:10.1371/journal.pone.0016271)
Supplement: Table S2 — Primary data from DIGE analysis (XLS) [file pone.0016271.s004.xls]

## Sheet: Sheet1
Master #	Accession #	Protein Name	Ratio D/C	p-value
744	gi|20304123	3-mercaptopyruvate sulfurtransferase	1.11	0.07
344	gi|13928850	3-phosphoglycerate dehydrogenase	1.3	0.0075
325	gi|51702230	60 kDa heat shock protein; mitochondrial precursor	-1.05	0.16
872	pdb|1BD7_A	A Chain A; Circularly Permuted Bb2 - Crystallin	1.02	0.42
105	gi|40538860	aconitase 2; mitochondrial	-1.07	0.21
1156	gi|4501887	actin; gamma 1 propeptide	-1.04	0.33
557	gi|4501887	actin; gamma 1 propeptide	1.07	0.14
965	gi|61556832	adenine phosphoribosyl transferase	1.69	0.059
746	gi|52345435	adenosine kinase	-1.1	0.097
505	gi|52345435	adenosine kinase	1.19	0.018
539	gi|1373230	adenosine kinase	1.26	0.0028
921	gi|61889092	adenylate kinase 1	1.34	0.14
924	gi|12083661	ADP-ribosylation factor-like 3	1.76	0.16
199	gi|158138568	albumin	1.1	0.23
195	gi|158138568	albumin	-1.25	0.13
202	gi|158138568	albumin	-1.04	0.37
203	gi|158138568	albumin	-1.21	0.17
658	gi|6978491	aldehyde reductase 1	1.16	0.14
661	gi|6978491	aldehyde reductase 1	1.14	0.1
542	gi|202837	aldolase A	-1.09	0.061
760	gi|202837	aldolase A	-1.17	0.0065
1165	gi|202837	aldolase A	-1.05	0.12
451	gi|6978489	aldolase C	-1.08	0.13
562	gi|6978489	aldolase C	1.02	0.3
564	gi|6978489	aldolase C	1.04	0.28
929	gi|57580	alpha B-crystallin	2.05	0.13
930	gi|57580	alpha B-crystallin	2.51	0.16
953	gi|30387800	alpha B-crystallin	4.33	0.11
395	gi|25090044	Alpha-aminoadipic semialdehyde dehydrogenase	1.09	0.16
534	gi|81884653	Aminoacylase-1A (N-acyl-L-amino-acid	1.05	0.13
556	gi|81884653	Aminoacylase-1A (N-acyl-L-amino-acid	1.16	0.025
420	gi|1374715	ATP synthase beta subunit	-1.17	0.12
349	gi|30421195	basophilic leukemia expressed sequence 06	1.05	0.11
1089	gi|546056	beta 1 globin [rats; Sprague-Dawley; Peptide; 146 aa]	1.01	0.39
1090	gi|546056	beta 1 globin [rats; Sprague-Dawley; Peptide; 146 aa]	1.01	0.39
994	gi|1531645	C2-HC type zinc finger protein r-MyT3	1.19	0.054
266	gi|11693172	calreticulin	-1.21	0.13
298	gi|11693172	calreticulin	-1.1	0.38
793	gi|9506445	carbonic anhydrase 2	-1.09	0.16
802	spt|P27139	Carbonic anhydrase II (EC 4.2.1.1) (Carbonate	1.03	0.34
757	gi|14488466	Chain A; Annexin V Complex With Heparin	1.15	0.12
878	gi|3891675	Chain A; Circularly Permuted Bb2-Crystallin	3.05	0.044
497	gi|13096481	Chain A; Crystal Structure Of Recombinant Rat-Liver	1.07	0.052
502	gi|13096481	Chain A; Crystal Structure Of Recombinant Rat-Liver	1.06	0.044
739	gi|13096481	Chain A; Crystal Structure Of Recombinant Rat-Liver	-1.11	0.025
622	gi|15826812	Chain A; Mammalian Thioredoxin Reductase	-1.14	0.11
309	gi|15826812	Chain A; Mammalian Thioredoxin Reductase	-1.05	0.23
327	gi|15826812	Chain A; Mammalian Thioredoxin Reductase	1.09	0.033
403	gi|6729934	Chain A; Rat Liver F1-Atpase	-1.1	0.28
384	gi|54400730	chaperonin containing TCP1; subunit 2 (beta)	-1.03	0.28
387	gi|54400730	chaperonin containing TCP1; subunit 2 (beta)	1.04	0.29
251	gi|40018616	chaperonin containing TCP1; subunit 3 (gamma)	-1.06	0.19
290	gi|51890219	chaperonin containing TCP1; subunit 5 (epsilon)	-1.04	0.24
375	gi|58219062	CNDP dipeptidase 2 (metallopeptidase M20 family)	1.08	0.13
967	gi|8393101	cofilin 1	1.01	0.38
1188	gi|203474	creatine kinase	-1.06	0.15
1167	gi|203474	creatine kinase	1.05	0.17
996	gi|19526477	crystallin; alpha A	4.91	0.044
978	gi|19526477	crystallin; alpha A	-1.29	0.027
997	gi|19526477	crystallin; alpha A	4.35	0.025
1143	gi|19526477	crystallin; alpha A	-1.16	0.15
1186	gi|19526477	crystallin; alpha A	1.85	0.23
914	gi|19526477	crystallin; alpha A	1.69	0.15
980	gi|19526477	crystallin; alpha A	1.77	0.21
1142	gi|19526477	crystallin; alpha A	1.7	0.24
904	gi|27465611	crystallin; beta A2	2.01	0.17
906	gi|27465611	crystallin; beta A2	2.58	0.16
947	gi|13928956	crystallin; beta A4	1.23	0.26
1192	gi|6681035	crystallin; beta B2	1.72	0.16
705	gi|16758840	crystallin; mu	1.05	0.3
117	gi|1151093	cytoplasmic dynein intermediate chain 2B	1.05	0.22
1202	gi|1836058	DA11	1.24	0.056
982	pir|JE0223	destrin - rat	1.13	0.26
209	gi|220838	dihydrolipoamide acetyltransferase	-1.14	0.11
364	gi|40786469	dihydrolipoamide dehydrogenase	-1	0.4
196	spt|P47942	Dihydropyrimidinase related protein-2 (DRP-2) (Turned	1.06	0.29
229	gi|40254595	dihydropyrimidinase-like 2	-1.05	0.23
1210	gi|40254595	dihydropyrimidinase-like 2	-1.12	0.033
197	gi|40254595	dihydropyrimidinase-like 2	1.13	0.025
230	gi|40254595	dihydropyrimidinase-like 2	-1.05	0.18
231	gi|40254595	dihydropyrimidinase-like 2	-1.08	0.11
1229	gi|25742568	dihydropyrimidinase-like 3	1.09	0.29
211	gi|12711692	dihydropyrimidinase-like 5	-1.04	0.29
780	gi|47087079	dimethylarginine dimethylaminohydrolase 2	1.14	0.13
764	gi|47087079	dimethylarginine dimethylaminohydrolase 2	1.15	0.064
931	gi|16924002	DJ-1 protein	1.03	0.31
1207	gi|16924002	DJ-1 protein	1.05	0.38
193	gi|347019	dnaK-type molecular chaperone hsp72-ps1-rat	1.14	0.0075
442	gi|51948450	dynactin 2	-1.03	0.27
70	gi|18093102	dynamin 1	-1.08	0.16
460	gi|38649320	Eno1 protein	-1.05	0.22
445	gi|158186649	enolase 1; alpha	-1.04	0.28
1166	gi|158186649	enolase 1; alpha	-1.11	0.12
436	gi|59808815	Enolase 1; alpha	1.04	0.36
461	gi|59808815	Enolase 1; alpha	-1.08	0.17
1161	gi|26023949	enolase 2; gamma	-1.09	0.16
1157	gi|26023949	enolase 2; gamma	-1.06	0.31
969	gi|19924089	expressed in non-metastatic cells 1; protein (NM23A)	1.25	0.1
1028	gi|19924089	expressed in non-metastatic cells 1; protein (NM23A)	-1.2	0.00032
753	gi|4826659	F-actin capping protein beta subunit	1.04	0.28
961	gi|38502804	Fas apoptotic inhibitory molecule 1 (rFAIM)	-1.14	0.17
964	gi|204128	ferritin heavy chain ferritin heavy chain	1.64	0.052
966	gi|204123	ferritin light chain	1.6	0.13
338	gi|22324680	FK506 binding protein 4	-1.04	0.27
324	gi|22324680	FK506 binding protein 4	1.04	0.35
601	gi|56090564	galactose mutarotase	1.26	0.028
433	gi|5030428	glial fibrillary acidic protein delta	1.3	0.071
434	gi|5030428	glial fibrillary acidic protein delta	1.15	0.13
519	gi|228136	Gln synthetase	1.05	0.21
522	gi|228136	Gln synthetase	1.02	0.37
524	gi|38181948	Gln synthetase	1.03	0.22
343	gi|46485440	glucose phosphate isomerase	1.07	0.17
316	gi|204197	glucose-6-phosphate dehydrogenase	-1.02	0.27
1153	gi|38181948	Glul protein	1.04	0.28
523	gi|38181948	Glul protein	1.06	0.14
386	gi|6980956	glutamate dehydrogenase 1	-1.11	0.13
1159	gi|13928688	glutathione S-transferase A5	1.05	0.3
898	gi|157820217	glutathione S-transferase; alpha 4	1.79	0.16
911	gi|25453412	glutathione S-transferase; pi 2	1.3	0.23
1204	gi|25453412	glutathione S-transferase; pi 2	1.29	0.15
858	gi|25282395	glutathione-S-transferase; mu 5	1.32	0.27
651	gi|56188	glyceraldehyde 3-phosphate-dehydrogenase	-1.04	0.34
652	gi|56188	glyceraldehyde 3-phosphate-dehydrogenase	-1.05	0.29
1162	gi|56611127	Glyceraldehyde-3-phosphate dehydrogenase	-1.07	0.29
649	gi|8393418	glyceraldehyde-3-phosphate dehydrogenase	-1.05	0.19
840	gi|46485429	glyoxylase 1	1.07	0.1
1228	gi|204444	Guanine nucleotide-binding protein alpha subunit	-1.35	0.025
689	gi|6680045	guanine nucleotide-binding protein; beta-1 subunit	-1.19	0.025
694	gi|6680045	guanine nucleotide-binding protein; beta-1 subunit	-1.13	0.13
301	gi|71534276	guanosine diphosphate dissociation inhibitor 1	-1.08	0.13
923	gi|61556989	guanylate kinase 1	-1.02	0.36
932	gi|61556989	guanylate kinase 1	-1.04	0.29
194	gi|47059179	heat shock 70kD protein 1B	1.16	0.015
1172	gi|25742763	heat shock 70kD protein 5	-1.12	0.044
168	gi|154816168	heat shock 70kDa protein 9A	-1.01	0.36
1178	gi|24025637	heat shock protein 4	1.03	0.24
165	gi|396270	heat shock protein 70	-1.04	0.31
192	rf|NP_077327.1	heat shock protein 8	1.23	0.13
157	gi|13242237	heat shock protein 8	1.1	0.044
166	rf|NP_077327.1	heat shock protein 8	-1.01	0.36
181	gi|13242237	heat shock protein 8	-1.08	0.11
182	gi|13242237	heat shock protein 8	-1.07	0.1
464	gi|19527048	heterogeneous nuclear ribonucleoprotein F	1.04	0.29
268	gi|13384620	heterogeneous nuclear ribonucleoprotein K	-1.05	0.28
269	gi|13384620	heterogeneous nuclear ribonucleoprotein K	-1.05	0.28
341	gi|14165437	heterogeneous nuclear ribonucleoprotein K isoform a	-1.06	0.24
1075	gi|12025520	histone cluster 1; H2aa	1.12	0.13
1110	gi|4504301	histone cluster 1; H4a	1.12	0.052
1114	gi|4504301	histone cluster 1; H4a	-1.01	0.4
1141	gi|4504301	histone cluster 1; H4a	1.01	0.39
1047	gi|223096	histone H2B	-1.23	0.27
1048	gi|223096	histone H2B	-1.13	0.25
1053	gi|223096	histone H2B	1.16	0.15
1211	gi|223096	histone H2B	-1.06	0.32
631	rf|XP_213407.2	hypothetical protein XP_213407	-1.3	0.052
826	gi|51092266	hypoxanthine guanine phosphoribosyl transferase	1.12	0.045
827	gi|51092266	hypoxanthine guanine phosphoribosyl transferase	1.14	0.064
777	rf|NP_114446.1	Inositol (myo)-1(or 4)-monophosphatase 1	1.03	0.28
646	gi|16758446	isocitrate dehydrogenase 3 (NAD+) alpha	-1.1	0.16
677	gi|16758446	isocitrate dehydrogenase 3 (NAD+) alpha	1.15	0.066
709	gi|8393706	lactate dehydrogenase A	-1.2	0.027
707	gi|8393706	lactate dehydrogenase A	-1.16	0.03
708	gi|8393706	lactate dehydrogenase A	-1.13	0.04
1189	gi|6981146	lactate dehydrogenase B	-1.09	0.17
342	gi|58865398	leucine aminopeptidase 3	1.1	0.031
452	gi|205942	liver nuclear protein p47	-1.03	0.24
314	gi|206205	M2 pyruvate kinase	-1.03	0.31
272	gi|206205	M2 pyruvate kinase	-1.05	0.24
275	gi|206205	M2 pyruvate kinase	-1.06	0.16
313	gi|206205	M2 pyruvate kinase	-1.12	0.056
287	gi|206205	M2 pyruvate kinase	-1.07	0.16
279	gi|206205	M2 pyruvate kinase	-1.05	0.26
285	gi|206205	M2 pyruvate kinase	-1.03	0.16
289	gi|206205	M2 pyruvate kinase	-1.07	0.16
725	gi|37590235	Malate dehydrogenase 1; NAD (soluble)	1	0.4
734	gi|37590235	Malate dehydrogenase 1; NAD (soluble)	1.08	0.11
1155	gi|37590235	Malate dehydrogenase 1; NAD (soluble)	1.03	0.29
1205	gi|37590235	Malate dehydrogenase 1; NAD (soluble)	1.07	0.12
104	gi|10637996	mitochondrial aconitase	-1.06	0.25
77	trm|Q9ER34	mitochondrial aconitase precursor	1.04	0.31
140	gi|53850628	NADH dehydrogenase (ubiquinone) Fe-S protein 1; 0026A05	-1.08	0.16
123	gi|13489067	N-ethylmaleimide sensitive fusion protein	-1.07	0.23
124	gi|13489067	N-ethylmaleimide sensitive fusion protein	-1.08	0.2
129	gi|13489067	N-ethylmaleimide sensitive fusion protein	-1.05	0.33
130	gi|13489067	N-ethylmaleimide sensitive fusion protein	-1.05	0.32
616	gi|203078	nucleolar protein B23.2	-1.17	0.045
1005	gi|8394009	peptidylprolyl isomerase A	-1.04	0.29
937	gi|8394432	peroxiredoxin 2	1.2	0.12
941	gi|34849738	Peroxiredoxin 2	-1.05	0.19
897	gi|16758348	peroxiredoxin 6	1.29	0.015
901	gi|16758348	peroxiredoxin 6	1.04	0.34
1171	gi|130135	Phosducin (PHD) (33 kDa phototransducing protein)	1.09	0.13
1139	gi|8393910	phosphatidylethanolamine binding protein	1.05	0.21
717	gi|8393962	phosphatidylinositol transfer protein	-1.05	0.24
255	gi|730311	Phosphoglucomutase-1 (Glucose phosphomutase 1)	-1.06	0.33
1164	gi|40254752	phosphoglycerate kinase 1	1.02	0.38
823	gi|114326546	phosphoglycerate mutase 1	-1.14	0.044
815	gi|114326546	phosphoglycerate mutase 1	-1.03	0.31
821	gi|114326546	phosphoglycerate mutase 1	-1.17	0.025
682	gi|4506127	phosphoribosyl pyrophosphate synthetase 1	-1.04	0.28
856	gi|57527332	phosphoserine phosphatase	1.21	0.095
819	gi|11693154	platelet-activating factor acetylhydrolase alpha 2 subunit	1.07	0.044
786	gi|6679299	prohibitin	1.09	0.18
775	gi|8394060	proteasome (prosome; macropain) subunit; alpha type 1	1.11	0.13
876	gi|8394063	proteasome (prosome; macropain) subunit; alpha type 2	1.67	0.052
320	gi|1352384	Protein disulfide-isomerase A3 precursor (Disulfide	-1.07	0.33
323	gi|1352384	Protein disulfide-isomerase A3 precursor (Disulfide	-1.08	0.13
321	gi|1352384	Protein disulfide-isomerase A3 precursor (Disulfide	-1.26	0.2
322	gi|1352384	Protein disulfide-isomerase A3 precursor (Disulfide	1.4	0.31
563	gi|6679573	purine rich element binding protein A	1.01	0.38
569	gi|6679573	purine rich element binding protein A	-1.04	0.14
55	rf|XP_340890.1	puromycin-sensitive aminopeptidase	1.06	0.21
712	gi|56090293	pyruvate dehydrogenase (lipoamide) beta	-1.21	0.04
236	rf|NP_445749.1	pyruvate kinase 3	-1.03	0.28
292	gi|16757994	pyruvate kinase; muscle	-1.06	0.018
297	gi|16757994	pyruvate kinase; muscle	-1.08	0.11
304	gi|16757994	pyruvate kinase; muscle	-1.13	0.025
312	gi|16757994	pyruvate kinase; muscle	-1.05	0.15
1002	gi|206580	RBL-NDP kinase 18kDa subunit (p18)	1.06	0.21
1140	gi|18266710	recoverin	-1.18	0.13
1158	gi|18266710	recoverin	1.02	0.39
394	gi|71896616	retinal S-antigen	-1.2	0.14
418	gi|71896616	retinal S-antigen	1.07	0.27
426	gi|71896616	retinal S-antigen	-1.11	0.28
431	gi|71896616	retinal S-antigen	-1.12	0.24
428	gi|71896616	retinal S-antigen	-1.1	0.29
806	gi|31982030	Rho GDP dissociation inhibitor (GDI) alpha	1.06	0.28
766	gi|5524727	RNA-binding protein SiahBP	-1.16	0.096
186	spt|P20770	serum albumin precursos {Contains:	-1.05	0.21
597	gi|2293468	SH3p4	-1.11	0.21
31	rf|XP_214690.2	similar to Alanyl-tRNA synthetase (Alanine--tRNA	-1	0.42
32	rf|XP_214690.2	similar to Alanyl-tRNA synthetase (Alanine--tRNA	1.02	0.34
162	rf|XP_340998.1	similar to ATPase; H+ transporting; V1 subunit A	1.07	0.25
179	rf|XP_340988.1	similar to ATPase; H+ transporting; V1 subunit A	-1.04	0.13
238	rf|XP_215516.2	similar to CCT (chaperonin containing TCP-1) epsilon	-1.06	0.27
587	rf|XP_214372.2	similar to CDNA sequence BC036333	-1.08	0.071
1147	rf|XP_228087.1	similar to DNA segment; Chr 10; Johns Hopkins	-1.06	0.26
726	rf|XP_214241.2	similar to esterase 10	1.02	0.26
1197	rf|XP_213368.1	similar to Eukaryotic translation initiation factor 5A	-1.05	0.25
894	gi|66730521	similar to GLUTATHIONE S-TRANSFERASE 8 (GST	1.47	0.0021
155	rf|XP_215574.2	similar to GMP synthase [glutamine-hydrolyzing]	1.07	0.07
1224	rf|XP_343481.1	similar to Gnat1 protein	1.07	0.27
899	rf|XP_221321.2	similar to hypothetical protein FLJ10560	1.62	0.18
246	rf|XP_342651.1	similar to Impdh1 protein	-1.11	0.1
262	rf|XP_342651.1	similar to Impdh1 protein	-1.07	0.14
331	rf|XP_342651.1	similar to Impdh1 protein	1.07	0.061
53	rf|XP_215549.2	similar to osmotic stress protein	-1.07	0.18
49	rf|XP_215549.2	similar to osmotic stress protein	-1.03	0.23
1195	rf|XP_215549.2	similar to osmotic stress protein	-1.03	0.3
1087	rf|XP_231925.2	similar to protein kinase C inhibitor	1.11	0.065
742	rf|XP_214155.2	similar to purine-nucleoside phosphorylase	1.13	0.28
488	rf|XP_215069.2	similar to RIKEN cDNA 2300002G02	1.07	0.12
988	rf|XP_227448.2	similar to RIKEN cDNA 2610024N01	1.2	0.17
583	rf|XP_218333.2	similar to ubiquitin-like 1 (sentrin) activating enzyme	1.1	0.11
877	gi|50401220	Stabilin-2 precursor (Fasciclin; EGF-like; laminin-type	-1.05	0.2
1194	gi|6981642	t-complex protein 1	-1.03	0.29
850	gi|38512111	Tpi1 protein	1.14	0.24
832	gi|38512111	Tpi1 protein	1.05	0.36
834	gi|38512111	Tpi1 protein	1.06	0.24
839	gi|38512111	Tpi1 protein	1.11	0.19
1206	gi|38512111	Tpi1 protein	1.04	0.21
669	gi|12002054	transaldolase	1.14	0.11
113	gi|61556986	transferrin	-1.1	0.34
114	gi|61556986	transferrin	-1.28	0.22
148	gi|1729977	Transketolase	-1.37	0.28
154	rf|NP_072114.1	transketolase	1.05	0.15
172	gi|1729977	Transketolase (TK)	1.15	0.061
173	gi|1729977	Transketolase (TK)	1.15	0.096
174	gi|1729977	Transketolase (TK)	1.17	0.11
175	gi|1729977	Transketolase (TK)	1.15	0.11
750	gi|11560081	translin-associated factor X	1.07	0.14
1184	gi|6755901	tubulin; alpha 1	-1.03	0.32
1182	gi|34740335	tubulin; alpha 1B	-1.08	0.29
351	gi|58865558	tubulin; alpha 1C	1.05	0.31
1183	gi|7106439	tubulin; beta 5	-1.09	0.3
779	gi|13928824	tyrosine 3-monooxygenase/tryptophan	-1.01	0.41
1187	gi|6756041	tyrosine 3-monooxygenase/tryptophan	1	0.41
479	gi|51948476	ubiquinol-cytochrome c reductase core protein 1	-1.11	0.13
866	gi|61098212	ubiquitin carboxy-terminal hydrolase L1	1.05	0.24
44	gi|62078893	ubiquitin-activating enzyme E1	1.04	0.28
1179	gi|62078893	ubiquitin-activating enzyme E1	1.06	0.095
1039	gi|16758810	ubiquitin-conjugating enzyme E2N	-1.04	0.33
381	gi|17105370	vacuolar H+ATPase B2	-1.05	0.21
382	gi|17105370	vacuolar H+ATPase B2	-1.09	0.018
60	gi|17865351	valosin-containing protein	-1.04	0.3
79	gi|17865351	valosin-containing protein	1.04	0.26
198	gi|62078997	WD repeat domain 1	1.03	0.29
200	gi|62078997	WD repeat domain 1	1.05	0.21
