# Supplementary material for: Multi-Modal Proteomic Analysis of Retinal Protein Expression Alterations in a Rat Model of Diabetic Retinopathy
Source: PLoS One. 2011 Jan 13;6(1):e16271. doi: 10.1371/journal.pone.0016271 (PMC3020973; doi:10.1371/journal.pone.0016271)
Supplement: Table S3 — Primary data from iTRAQ analysis (XLS) [file pone.0016271.s005.xls]

## Sheet: Sheet1
Accession	Name	Peptides(95%)	Ratio D/C	t-test	N	Unused	Total	%Cov	%Cov(50)	%Cov(95)
gi|94730428	RecName: Full=Synaptotagmin-1; AltName: Full=Synaptotagmin I; Short=SytI; AltName: Full=p65	5	0.880654	0.000799265	143	10.72	10.73	22.33	13.3	11.88
gi|55727	assembly protein 180 (AP180) + insert [Rattus norvegicus]	6	0.877528	0.00125102	122	12.12	12.18	13.22	7.869	7.869
gi|61098195	RAB3A, member RAS oncogene family [Rattus norvegicus]	6	0.884023	0.00286541	177	8.67	8.67	27.73	25	25
gi|576438	glutathione transferase [Rattus norvegicus]	16	1.53002	0.00375328	52	25.41	25.41	61.09	57.01	49.77
gi|56054	D100 [Rattus norvegicus]	12	0.598906	0.0069195	50	25.52	25.52	27.73	19.98	17.39
gi|38181888	Proteasome (prosome, macropain) 26S subunit, ATPase 2 [Rattus norvegicus]	2	0.93756	0.0076391	307	4.92	4.94	10.39	9.469	6.005
gi|157822587	phosphodiesterase 6B [Rattus norvegicus]	4	0.861946	0.00906686	325	4.41	8.57	10.98	5.958	4.907
gi|157830218	Chain A, Recombinant Rat Annexin V, Triple Mutant (T72k, S144k, S228k)	3	1.93733	0.00979376	266	6	6	17.87	11.29	11.29
gi|81902084	RecName: Full=Citrate synthase, mitochondrial; Flags: Precursor	5	1.04966	0.0101012	154	10.05	10.08	14.16	12.02	12.02
gi|83754296	Chain A, High Resolution Structure Of The Hdgf Pwwp Domain	4	0.912717	0.0101877	218	7.37	7.37	43.64	37.27	37.27
gi|158635952	rod-type transducin alpha subunit [Rattus norvegicus]	16	0.524594	0.0104854	44	28.27	28.76	42.29	33.43	33.43
gi|55977739	RecName: Full=Heat shock 70 kDa protein 1A/1B; AltName: Full=Heat shock 70 kDa protein 1/2; AltName: Full=HSP70.1/2	30	2.01944	0.0108409	23	37.93	55.57	55.23	50.23	45.4
gi|54261671	Diazepam binding inhibitor (GABA receptor modulator, acyl-Coenzyme A binding protein) [Rattus norvegicus]	13	1.40756	0.0123857	77	19.87	19.88	79.31	78.16	78.16
gi|81910041	RecName: Full=WD repeat-containing protein 1	2	1.13444	0.0138424	386	4	4	6.931	5.941	5.941
gi|58865424	ATPase, H+ transporting, lysosomal 38kDa, V0 subunit d1 [Rattus norvegicus]	2	0.625739	0.0143308	295	5.22	5.22	11.11	9.402	5.413
gi|82546819	heterogeneous nuclear ribonucleoprotein F [Rattus norvegicus]	6	0.880509	0.0147277	287	5.4	7.88	15.9	14.7	13.49
gi|76779404	Tubulin, beta 2b [Rattus norvegicus]	64	1.27382	0.0153516	579	2	66.54	67.42	64.04	55.73
gi|47115521	RecName: Full=COP9 signalosome complex subunit 2; Short=Signalosome subunit 2; Short=SGN2; AltName: Full=JAB1-containing signalosome subunit 2; AltName: Full=Thyroid receptor-interacting protein 15; Short=TRIP-15; AltName: Full=Alien homolog	3	1.12563	0.0160012	263	6	6.01	14.22	7.449	7.449
gi|6981614	vesicle-associated membrane protein 2 [Rattus norvegicus]	6	0.714113	0.0164037	158	10.02	10.02	68.1	43.1	43.1
gi|78103212	RecName: Full=Thymosin beta-4; Short=T beta 4; Contains: RecName: Full=Hematopoietic system regulatory peptide; AltName: Full=Seraspenide	4	1.55767	0.0170243	249	6.1	6.1	70.45	70.45	70.45
gi|38512104	Arginyl aminopeptidase (aminopeptidase B) [Rattus norvegicus]	4	1.10378	0.017724	185	8.44	8.93	7.692	7.692	6.615
gi|547890	RecName: Full=Microtubule-associated protein 2; Short=MAP-2	2	0.796049	0.0196987	319	4.55	5.03	4.406	2.472	1.343
gi|266495	RecName: Full=Myristoylated alanine-rich C-kinase substrate; Short=MARCKS; AltName: Full=Protein kinase C substrate 80 kDa protein	5	1.5115	0.0198155	151	10.22	10.22	24.92	24.6	24.6
gi|6981340	Purkinje cell protein 4 [Rattus norvegicus]	4	0.917364	0.0207519	273	6	6	43.55	43.55	43.55
gi|6978966	type II brain 4.1 minor isoform [Rattus norvegicus]	2	0.861425	0.0275557	318	4.57	4.57	3.738	3.323	2.7
gi|55250726	Nucleolin [Rattus norvegicus]	8	0.945937	0.028163	105	14.01	14.01	13.59	10.22	10.22
gi|66793366	glutamyl-prolyl-tRNA synthetase [Rattus norvegicus]	4	1.12891	0.030792	207	7.75	7.91	7.537	3.163	3.163
gi|81883689	RecName: Full=F-actin-capping protein subunit beta; AltName: Full=CapZ beta	2	0.91572	0.0330477	409	3.7	4.18	8.456	8.456	6.985
gi|109500010	PREDICTED: similar to H2A histone family, member V isoform 1 [Rattus norvegicus]	4	1.10432	0.0360445	201	8	8	17.11	15.21	15.21
gi|149026014	similar to RIKEN cDNA 1500009M05 (predicted) [Rattus norvegicus]	2	1.10476	0.0420094	410	3.7	3.72	23.7	20.74	20.74
gi|2145469	amphiphysin [Rattus norvegicus]	4	0.922828	0.042185	205	7.85	7.85	17.18	10.54	8.163
gi|158303294	glutaminase isoform a [Rattus norvegicus]	5	1.08816	0.042431	178	8.66	8.68	25.82	12.91	11.42
gi|83305012	RecName: Full=Neurofilament heavy polypeptide; Short=NF-H; AltName: Full=Neurofilament triplet H protein; AltName: Full=200 kDa neurofilament protein	3	0.677652	0.0427913	596	2	4.01	3.078	2.146	2.146
gi|195539900	Tubulin, beta 4 [Rattus norvegicus]	59	0.731772	0.0452441	160	10	65.76	70.05	62.61	58.78
gi|8394171	reticulocalbin 2 [Rattus norvegicus]	2	0.0628658	0.0461874	380	4	4	15.09	13.21	13.21
gi|81884348	RecName: Full=Cytosol aminopeptidase; AltName: Full=Leucine aminopeptidase; AltName: Full=Leucyl aminopeptidase; AltName: Full=Leucine aminopeptidase 3; Short=LAP; AltName: Full=Proline aminopeptidase; AltName: Full=Prolyl aminopeptidase	2	1.20369	0.0470463	370	4	4.05	6.166	3.854	3.854
gi|55250706	3'(2'), 5'-bisphosphate nucleotidase 1 [Rattus norvegicus]	2	1.13949	0.0508989	412	3.7	3.7	13.96	7.792	7.792
gi|5931745	mu crystallin [Rattus norvegicus]	9	3.01362	0.0510363	94	15.6	15.6	32.91	32.91	32.91
gi|81892462	RecName: Full=V-type proton ATPase subunit E 1; Short=V-ATPase subunit E 1; AltName: Full=Vacuolar proton pump subunit E 1	3	0.804269	0.0522699	244	6.24	6.25	30.97	15.49	15.49
gi|197246471	Rbbp4 protein [Rattus norvegicus]	3	1.1546	0.0524436	270	6	6	8	7.059	7.059
gi|83977457	3-hydroxyisobutyrate dehydrogenase [Rattus norvegicus]	4	1.47433	0.054755	194	8.01	8.02	20.9	17.61	17.61
gi|81886881	RecName: Full=Heat shock 70 kDa protein 4; AltName: Full=Ischemia responsive 94 kDa protein	5	0.943726	0.0549222	168	9.53	9.53	10.24	7.024	7.024
gi|6981010	hemoglobin alpha 1 chain [Rattus norvegicus]	20	0.669733	0.0551196	72	20.06	20.35	69.72	66.9	66.9
gi|77748047	Alg2 protein [Rattus norvegicus]	2	1.10287	0.0572705	303	5.05	5.05	24.88	17.7	13.88
gi|56823	p38 (partial) (298 AA) [Rattus norvegicus]	2	0.825008	0.0580972	373	4	4.01	9.732	7.718	7.718
gi|1314854	SNAP-25a	4	0.918532	0.061389	209	7.73	7.73	44.2	30.39	30.39
gi|9507245	tyrosine 3-monooxygenase/tryptophan 5-monooxygenase activation protein, gamma polypeptide [Rattus norvegicus]	13	0.910716	0.0616633	167	9.73	15.49	36.44	34.01	34.01
gi|6978725	cytochrome c, somatic [Rattus norvegicus]	8	0.975158	0.0635167	101	14.98	14.98	68.57	61.9	56.19
gi|81916637	RecName: Full=WD40 repeat-containing protein SMU1; AltName: Full=Smu-1 suppressor of mec-8 and unc-52 protein homolog; AltName: Full=Brain-enriched WD repeat-containing protein	2	0.855722	0.0637805	625	2	2.06	3.119	1.949	1.949
gi|9082303	amphoterin [Rattus norvegicus]	2	1.76283	0.0639074	274	5.96	5.96	45.12	17.21	13.49
gi|157818467	heat shock 70kDa protein 12A [Rattus norvegicus]	2	0.952446	0.0653487	313	4.78	4.78	7.111	6.37	3.111
gi|8394168	calmodulin 2 [Rattus norvegicus]	16	0.759666	0.0678188	91	16.23	16.24	74.5	67.11	67.11
gi|158749540	aminopeptidase puromycin sensitive [Rattus norvegicus]	2	0.946032	0.0685725	290	5.39	5.39	10.43	4.674	2.717
gi|78214339	transgelin 3 [Rattus norvegicus]	2	0.861257	0.0689368	343	4.14	4.14	16.08	12.06	12.06
gi|61216932	RecName: Full=14-3-3 protein epsilon; Short=14-3-3E; AltName: Full=Mitochondrial import stimulation factor L subunit; Short=MSF L	17	0.751388	0.0722452	85	18.23	22.29	52.94	48.63	46.67
gi|56799436	chromobox homolog 3 [Rattus norvegicus]	3	1.03291	0.0744893	277	5.71	5.71	20.77	16.94	16.94
gi|71122452	LIM and SH3 protein 1 [Rattus norvegicus]	5	1.05168	0.074771	183	8.47	8.47	19.39	19.39	15.59
gi|5030428	glial fibrillary acidic protein delta [Rattus norvegicus]	12	6.60098	0.076243	76	19.88	21.88	32.07	25.42	25.42
gi|154816168	heat shock protein 9 [Rattus norvegicus]	6	1.15788	0.0772257	133	11.52	13.52	21.21	14.73	10.6
gi|34878522	PREDICTED: similar to DJ-1 protein [Rattus norvegicus]	2	1.17221	0.0781762	1177	0.14	4.14	24.77	9.174	9.174
gi|55855	precursor (AA -17 to 399) [Rattus norvegicus]	13	0.621652	0.0829829	56	24.27	24.27	46.15	34.13	30.05
gi|210032365	tumor rejection antigen gp96 [Rattus norvegicus]	5	0.880598	0.0873362	187	8.24	8.25	18.53	7.09	6.343
gi|77404363	nucleosome assembly protein 1-like 1 [Rattus norvegicus]	7	1.40092	0.0908456	153	10.12	10.13	24.04	18.16	18.16
gi|81862081	RecName: Full=Protein IMPACT; AltName: Full=Imprinted and ancient gene protein homolog	3	0.83204	0.0920573	265	6	6.01	21.14	19.56	19.56
gi|81867103	RecName: Full=Protein NDRG2; AltName: Full=NDRG1-related protein; AltName: Full=Antidepressant-related protein ADRG123	3	0.871272	0.0943657	283	5.59	5.59	20.22	13.21	13.21
gi|71051349	Eukaryotic translation elongation factor 1 gamma [Rattus norvegicus]	5	1.12719	0.0967175	215	7.52	7.52	12.81	10.07	10.07
gi|62825891	Phosphofructokinase, muscle [Rattus norvegicus]	2	1.21726	0.0981552	539	2.02	4.08	10	3.59	3.59
gi|58865568	transmembrane protein 24 [Rattus norvegicus]	2	0.846103	0.102559	397	4	4	3.824	3.824	3.824
gi|57301	unnamed protein product [Rattus norvegicus]	3	0.945603	0.107062	362	4	6	18.77	14.18	14.18
gi|57241	sulfated glycoprotein 2 [Rattus norvegicus]	2	1.81099	0.108049	355	4.02	4.02	11.41	6.711	6.711
gi|71122474	Ppa1 protein [Rattus norvegicus]	5	0.85404	0.114271	198	8	8	17.52	15.41	15.41
gi|149016757	glucan (1,4-alpha-), branching enzyme 1, isoform CRA_b [Rattus norvegicus]	3	0.901601	0.116297	246	6.2	6.2	19.94	5.983	5.983
gi|81911258	RecName: Full=T-complex protein 1 subunit gamma; Short=TCP-1-gamma; AltName: Full=CCT-gamma	4	1.08238	0.116605	213	7.54	7.58	21.65	10.64	10.64
gi|56799432	radixin [Rattus norvegicus]	3	0.854106	0.116689	245	6.21	6.23	13.89	5.66	5.66
gi|56090475	S-phase kinase-associated protein 1 [Rattus norvegicus]	3	0.920661	0.117727	291	5.3	5.3	16.56	16.56	16.56
gi|56757324	RecName: Full=Alpha-enolase; AltName: Full=2-phospho-D-glycerate hydro-lyase; AltName: Full=Non-neural enolase; Short=NNE; AltName: Full=Enolase 1	57	0.792926	0.123819	4	66.1	66.1	74.19	72.35	70.97
gi|694108	macrophage migration inhibitory factor	6	0.668136	0.124596	241	6.29	6.29	41.74	35.65	35.65
gi|157786806	phosphoribosylformylglycinamidine synthase [Rattus norvegicus]	3	1.26904	0.12597	317	4.6	4.61	8.891	2.046	1.652
gi|91207082	RecName: Full=Eukaryotic translation initiation factor 5A-1; Short=eIF-5A-1; Short=eIF-5A1; AltName: Full=Eukaryotic initiation factor 5A isoform 1; Short=eIF-5A; AltName: Full=eIF-4D	2	3.23013	0.126946	306	4.98	4.98	39.61	34.42	18.83
gi|984679	beta-globin [Rattus norvegicus]	22	0.893947	0.128872	63	21.83	21.83	88.44	76.19	57.14
gi|56252	beta-globin [Rattus norvegicus]	17	0.679139	0.129674	260	6	19.46	80.27	74.83	55.78
gi|47477769	Spna2 protein [Rattus norvegicus]	14	1.30492	0.130503	38	29.49	29.5	16.88	7.749	6.933
gi|40786463	ATPase, H+ transporting, lysosomal V1 subunit D [Rattus norvegicus]	3	0.931655	0.130741	212	7.6	7.6	30.36	23.08	13.36
gi|6139055	myo-inositol monophosphatase [Rattus norvegicus]	2	0.906509	0.131634	296	5.15	5.15	11.19	11.19	7.942
gi|149030778	rCG20041, isoform CRA_a [Rattus norvegicus]	4	0.911726	0.138186	299	5.07	9.08	35.5	27.5	23.5
gi|54607147	ras-related C3 botulinum toxin substrate 1 (rho family, small GTP binding protein Rac1) [Rattus norvegicus]	2	1.07721	0.139712	342	4.18	4.19	18.75	13.54	13.54
gi|208609970	leucine rich repeat containing 47 [Rattus norvegicus]	2	0.921767	0.140835	376	4	4	12.41	4.483	4.483
gi|81892272	RecName: Full=Glucose-6-phosphate isomerase; Short=GPI; AltName: Full=Phosphoglucose isomerase; Short=PGI; AltName: Full=Phosphohexose isomerase; Short=PHI; AltName: Full=Autocrine motility factor; Short=AMF; AltName: Full=Neuroleukin; Short=NLK	25	0.777739	0.142454	26	35.42	35.42	42.47	40.86	40.5
gi|21666559	TUC-4b [Rattus norvegicus]	17	1.17117	0.143966	66	21.68	28.86	35.43	30.01	28.4
gi|149065132	IMP (inosine monophosphate) dehydrogenase 1 (predicted), isoform CRA_b [Rattus norvegicus]	9	0.751798	0.144198	88	16.94	16.97	30.54	22.18	22.18
gi|6980972	glutamate oxaloacetate transaminase 2 [Rattus norvegicus]	11	1.20578	0.145457	87	17.02	17.17	30.7	23.26	23.26
gi|47605935	RecName: Full=Transforming protein RhoA; Flags: Precursor	3	1.08671	0.147092	280	5.7	5.7	22.8	22.8	22.8
gi|77917528	ATPase inhibitory factor 1 [Rattus norvegicus]	2	1.06866	0.149817	356	4.02	4.02	27.1	17.76	17.76
gi|81911540	RecName: Full=Secretagogin	3	0.935674	0.151437	256	6.01	6.14	23.55	14.86	14.86
gi|157820375	retinaldehyde binding protein 1 [Rattus norvegicus]	18	0.597747	0.155072	36	30.25	30.25	65.93	60.88	51.42
gi|2145467	amphiphysin [Rattus norvegicus]	11	0.839843	0.155729	61	22.48	22.48	27.82	23.72	22.69
gi|38512111	Tpi1 protein [Rattus norvegicus]	34	1.3125	0.157059	24	36.47	36.47	87.5	83.47	83.47
gi|2689658	mutant type II hexokinase [Rattus norvegicus]	4	0.943258	0.164915	229	6.73	9.91	18.43	6.543	4.58
gi|81883530	RecName: Full=Nucleosome assembly protein 1-like 4	2	1.18226	0.173246	1145	0.16	2.16	8.29	2.591	2.591
gi|202846	aldehyde dehydrogenase (EC 1.2.1.3)	2	0.838557	0.183004	338	4.24	4.24	12.18	3.393	3.393
gi|47271546	cold inducible RNA binding protein [Rattus norvegicus]	3	0.909106	0.185743	363	4	5.7	25	14.53	14.53
gi|55977470	RecName: Full=Tubulin alpha-1A chain; AltName: Full=Tubulin alpha-1 chain; AltName: Full=Alpha-tubulin 1	63	0.857641	0.186396	7	48.5	48.5	61.86	54.32	49.67
gi|197246473	Prkca protein [Rattus norvegicus]	4	0.875067	0.188619	180	8.65	8.66	13.24	9.97	9.077
gi|8850229	microtubule-associated protein 6 [Rattus norvegicus]	4	0.932158	0.188935	170	9.18	9.18	10.71	7.143	5.882
gi|33086694	Da2-35 [Rattus norvegicus]	2	1.27402	0.190422	302	5.05	5.05	20.86	13.31	9.712
gi|8671360	Ulip-like protein [Rattus norvegicus]	4	1.12455	0.190748	252	6.05	6.53	15.6	10.11	9.397
gi|8393706	L-lactate dehydrogenase A [Rattus norvegicus]	20	0.735198	0.191093	25	35.87	35.87	65.96	53.31	42.17
gi|85057089	Eukaryotic translation elongation factor 1 alpha 1 [Rattus norvegicus]	12	1.03898	0.191633	62	22.29	22.29	37.23	22.73	21.21
gi|51702769	RecName: Full=Profilin-1; AltName: Full=Profilin I	2	0.949827	0.192216	315	4.67	4.67	39.29	31.43	21.43
gi|9506445	carbonic anhydrase II [Rattus norvegicus]	23	0.837155	0.194761	48	27.03	27.03	57.69	57.69	55.38
gi|6981712	tyrosine 3-monooxygenase/tryptophan 5-monooxygenase activation protein, theta polypeptide [Rattus norvegicus]	12	1.10636	0.198692	261	6	13.76	34.29	34.29	34.29
gi|34849734	Thioredoxin 1 [Rattus norvegicus]	3	0.933552	0.19885	224	7.1	7.1	31.43	31.43	31.43
gi|461731	RecName: Full=10 kDa heat shock protein, mitochondrial; AltName: Full=Hsp10; AltName: Full=10 kDa chaperonin; AltName: Full=CPN10	6	1.21945	0.199874	173	9.1	9.1	47.06	43.14	43.14
gi|109512366	PREDICTED: similar to transcription elongation factor A (SII)-like 3 isoform 2 [Rattus norvegicus]	5	0.796154	0.200201	146	10.46	10.46	35.18	33.17	27.14
gi|81917630	RecName: Full=Vesicle-fusing ATPase; AltName: Full=N-ethylmaleimide-sensitive fusion protein; Short=NEM-sensitive fusion protein; AltName: Full=Vesicular-fusion protein NSF	14	0.852581	0.203425	46	27.53	27.53	28.9	22.31	18.41
gi|9507125	synuclein, alpha (non A4 component of amyloid precursor) [Rattus norvegicus]	4	1.10796	0.203659	589	2	6.41	28.57	28.57	24.29
gi|157819777	kinesin family member 5C [Rattus norvegicus]	2	0.961446	0.204699	332	4.29	4.77	8.272	3.037	2.618
gi|462569	RecName: Full=Microtubule-associated protein 1A; Short=MAP-1A; Contains: RecName: Full=MAP1 light chain LC2	2	0.852121	0.208156	488	2.17	4.26	4.074	0.8291	0.8291
gi|149034222	transketolase, isoform CRA_b [Rattus norvegicus]	23	1.16447	0.209846	20	40.8	40.8	43.34	38.2	36.44
gi|149052977	recoverin [Rattus norvegicus]	24	0.663526	0.213959	35	31.31	31.31	64.36	64.36	64.36
gi|6978491	aldo-keto reductase family 1, member B1 [Rattus norvegicus]	5	1.5633	0.215664	149	10.34	10.34	20.57	20.57	17.41
gi|19424194	RAB3C, member RAS oncogene family [Rattus norvegicus]	2	0.880899	0.216476	595	2	4.03	18.5	10.13	10.13
gi|535742	palmitoyl-protein thioesterase	2	0.897845	0.224314	371	4	4.03	10.13	8.824	8.824
gi|60688124	Hydroxyacyl-Coenzyme A dehydrogenase/3-ketoacyl-Coenzyme A thiolase/enoyl-Coenzyme A hydratase (trifunctional protein), alpha subunit [Rattus norvegicus]	2	1.11219	0.23305	339	4.24	4.24	9.961	3.67	3.67
gi|158749620	microtubule-associated protein 1B [Rattus norvegicus]	19	1.45677	0.239319	16	42.48	42.49	14.67	11.91	10.52
gi|149029702	rCG42492 [Rattus norvegicus]	2	0.943152	0.240364	391	4	4	25.27	14.84	14.84
gi|157819677	sarcolemma associated protein [Rattus norvegicus]	6	0.9771	0.246214	114	12.77	12.78	15.25	8.259	8.259
gi|188497679	apoptosis inhibitor 5 [Rattus norvegicus]	3	0.926327	0.24623	271	6	6	9.127	8.333	8.333
gi|92090643	RecName: Full=Transaldolase	9	1.27736	0.247834	96	15.5	15.99	33.83	25.82	22.85
gi|4558035	Chain C, Structural Analysis Of Phosducin And Its Phosphorylation- Regulated Interaction With Transducin Beta-Gamma	19	1.51532	0.248542	57	23.72	23.72	70.73	58.13	58.13
gi|115503760	RecName: Full=AP2-associated protein kinase 1; AltName: Full=Adaptor-associated kinase 1	5	0.93416	0.24983	155	10.04	10.52	11.12	7.277	6.861
gi|157823715	tubulin polymerization promoting protein [Rattus norvegicus]	2	0.885944	0.252445	405	3.8	3.81	19.72	19.27	19.27
gi|40254781	GDP dissociation inhibitor 2 [Rattus norvegicus]	10	1.19836	0.252977	206	7.83	11.77	28.31	19.33	19.33
gi|8394328	superoxide dismutase 1, soluble [Rattus norvegicus]	8	0.949251	0.261587	92	16	16	58.44	58.44	58.44
gi|149015564	Purkinje cell protein 2 (L7), isoform CRA_b [Rattus norvegicus]	2	0.873444	0.263432	348	4.07	4.07	36.11	17.36	17.36
gi|9843869	damage-specific DNA binding protein 1 [Rattus norvegicus]	2	0.939106	0.264676	352	4.02	4.03	3.158	2.719	2.719
gi|9845261	lectin, galactoside-binding, soluble, 1 [Rattus norvegicus]	2	1.05396	0.265152	393	4	4	14.81	14.81	14.81
gi|224487700	RecName: Full=Coactosin-like protein	3	1.04488	0.266453	281	5.64	5.64	21.13	16.9	16.9
gi|55926145	nucleoside diphosphate kinase B [Rattus norvegicus]	5	1.07021	0.267315	176	8.95	8.95	54.61	36.84	30.26
gi|6103726	antioxidant enzyme B166 [Rattus norvegicus]	7	0.962836	0.268948	107	13.7	13.7	37.56	30.99	30.99
gi|34878862	PREDICTED: similar to Transcriptional activator protein Pur-alpha (Purine-rich single-stranded DNA-binding protein alpha) [Rattus norvegicus]	2	0.694816	0.269184	354	4.02	4.02	14.33	9.969	9.969
gi|109505989	PREDICTED: similar to Histone H2A type 1 [Rattus norvegicus]	3	0.651201	0.270874	436	3.03	7.03	28.57	25	20.83
gi|157820113	RAN binding protein 1 [Rattus norvegicus]	3	1.04883	0.27128	267	6	6	30.05	22.17	22.17
gi|204349	glutamine synthetase	32	0.770938	0.271483	19	40.92	40.92	56.57	39.41	37.8
gi|62201921	Prothymosin alpha [Rattus norvegicus]	4	1.16537	0.273592	200	8	8	38.39	33.93	33.93
gi|6981352	phosphofructokinase, liver [Rattus norvegicus]	3	0.932642	0.274066	219	7.33	7.33	9.231	7.564	4.231
gi|56754676	RecName: Full=Tubulin beta-5 chain	66	1.13732	0.2767	196	8	65.45	69.14	61.71	57.88
gi|78365255	dihydrolipoamide S-acetyltransferase [Rattus norvegicus]	2	0.47904	0.27696	387	4	4	6.646	5.063	5.063
gi|6822247	Nogo-A protein [Rattus norvegicus]	6	1.08669	0.277506	138	11.23	11.23	10.66	9.372	7.223
gi|206989652	unnamed protein product [Rattus norvegicus]	5	0.918779	0.280973	156	10.02	10.04	9.021	5.874	5.874
gi|189085365	NADH dehydrogenase (ubiquinone) 1 alpha subcomplex, 4 [Rattus norvegicus]	2	0.862783	0.281209	403	4	4	23.17	23.17	23.17
gi|203628	gamma-B-crystallin	6	4.85751	0.281628	123	12.05	12.05	46.29	37.14	26.86
gi|6981710	tyrosine 3-monooxygenase/tryptophan 5-monooxygenase activation protein, eta polypeptide [Rattus norvegicus]	10	0.870859	0.289456	416	3.52	11.28	29.67	21.95	21.95
gi|149034122	retinol binding protein 3, interstitial [Rattus norvegicus]	19	0.704151	0.28968	31	34.12	34.12	24.96	19.53	19.53
gi|55926139	alpha isoform of regulatory subunit A, protein phosphatase 2 [Rattus norvegicus]	6	1.22708	0.293086	120	12.15	12.15	15.79	10.19	10.19
gi|149054487	rCG32645, isoform CRA_h [Rattus norvegicus]	4	0.928802	0.294272	199	8	8	17.64	11.99	11.99
gi|9955091	Chain B, Solution Structure Of The C-Terminal Negative Regulatory Domain Of P53 In A Complex With Ca2+-Bound S100b(Bb)	2	1.14818	0.295809	392	4	4	16.3	16.3	16.3
gi|687712	lens epithelial protein	3	1.04169	0.298644	389	4	4	16.28	13.95	13.95
gi|57480	vimentin [Rattus norvegicus]	30	1.79504	0.300856	10	46.83	47.31	56.44	50.86	47.85
gi|68844977	RecName: Full=Ubiquitin carboxyl-terminal hydrolase isozyme L1; Short=UCH-L1; AltName: Full=Ubiquitin thioesterase L1; AltName: Full=Neuron cytoplasmic protein 9.5; AltName: Full=PGP 9.5; Short=PGP9.5	3	0.955429	0.303983	222	7.23	7.23	23.32	18.83	15.25
gi|81889864	RecName: Full=Tubulin alpha-4A chain; AltName: Full=Tubulin alpha-4 chain; AltName: Full=Alpha-tubulin 4	54	0.756227	0.30465	99	15.15	46.81	58.71	51.12	48.44
gi|951425	housekeeping protein	19	1.11391	0.307798	42	28.73	28.73	77.44	74.39	71.34
gi|55992	cytochrome c oxidase subunit VIa (AA 1 - 118) [Rattus norvegicus]	2	0.784121	0.309004	398	4	4	22.22	22.22	22.22
gi|6647578	RecName: Full=Membrane-associated progesterone receptor component 1; AltName: Full=Acidic 25 kDa protein; AltName: Full=25-DX; AltName: Full=Ventral midline antigen; Short=VEMA	3	1.19876	0.314183	234	6.42	6.42	15.9	13.33	10.26
gi|4240462	VAMP-associated protein A [Rattus norvegicus]	2	1.09923	0.314325	401	4	4	11.16	11.16	11.16
gi|729919	RecName: Full=Lupus La protein homolog; AltName: Full=La ribonucleoprotein; AltName: Full=La autoantigen homolog	2	1.06184	0.32079	418	3.52	3.54	20.72	4.819	4.819
gi|82794761	v-H+ATPase subunit a1-III [Rattus norvegicus]	5	0.957421	0.325065	157	10.02	10.03	15.02	7.813	7.813
gi|1051270	14-3-3 zeta isoform	21	0.9024	0.3327	49	25.97	25.97	58.37	52.24	52.24
gi|81910365	RecName: Full=Acidic leucine-rich nuclear phosphoprotein 32 family member E	8	0.693856	0.334055	100	15.05	15.05	45.35	44.19	41.47
gi|109477289	PREDICTED: similar to Neuron-specific calcium-binding protein hippocalcin (P23K) [Rattus norvegicus]	4	0.974311	0.340371	453	2.74	8.94	26.79	13.57	10
gi|171846648	Protein kinase C substrate 80K-H [Rattus norvegicus]	3	0.961201	0.340501	225	7.01	7.01	16	9.143	6.286
gi|83304285	RecName: Full=cAMP-dependent protein kinase type II-alpha regulatory subunit	11	1.08084	0.340591	86	18.07	18.08	37.41	33.92	33.92
gi|158186698	heterogeneous nuclear ribonucleoprotein M isoform a [Rattus norvegicus]	4	0.949536	0.342602	208	7.74	7.74	18.11	6.173	6.173
gi|61889112	cell division cycle 42 [Rattus norvegicus]	3	0.884028	0.343247	591	2	5.73	35.08	20.42	20.42
cont|000137	spt|P00760| Cationic trypsin precursor (EC 3.4.21.4) (Beta-trypsin) (Fragment)	89	0.670679	0.346786	17	41.65	41.65	77.37	63.79	61.32
gi|6981468	peripherin 2 [Rattus norvegicus]	5	0.812104	0.348122	165	9.88	9.88	13.58	13.58	11.27
gi|47059104	ATPase, H+ transporting, lysosomal V1 subunit G2 [Rattus norvegicus]	4	0.931987	0.349697	268	6	6	62.71	30.51	30.51
gi|8918488	adenylate kinase isozyme 1 [Rattus norvegicus]	2	1.05759	0.350121	314	4.7	4.7	35.05	20.62	13.4
gi|149041704	isocitrate dehydrogenase 3 (NAD+) alpha, isoform CRA_f [Rattus norvegicus]	6	0.974875	0.350947	141	11.05	11.07	44.6	26.32	13.57
gi|50926121	Dync1i2 protein [Rattus norvegicus]	2	1.05668	0.352573	330	4.32	4.32	11.55	7.595	6.171
gi|744592	alpha-B crystallin	18	5.76766	0.354762	45	27.87	27.87	78.86	69.14	62.86
gi|32363196	RecName: Full=Moesin; AltName: Full=Membrane-organizing extension spike protein	3	1.32886	0.355918	538	2.02	6.21	16.12	6.066	6.066
gi|737713	Cys-rich protein CRP2	2	1.32886	0.355918	573	2.01	2.01	19.23	15.38	15.38
gi|54038996	RecName: Full=Ras-related protein Ral-A; Flags: Precursor	2	1.14717	0.356168	334	4.26	4.26	14.56	12.62	12.62
gi|585688	RecName: Full=Glycogen phosphorylase, liver form	2	1.03467	0.356577	946	0.42	4.49	9.294	3.059	2.353
gi|8393910	phosphatidylethanolamine binding protein [Rattus norvegicus]	31	1.38483	0.357402	18	41.22	41.22	96.79	95.19	82.89
gi|229522	crystallin alphaA2	24	6.61812	0.360522	41	28.87	28.87	58.38	52.6	50.29
gi|77748404	Camk2d protein [Rattus norvegicus]	3	1.06501	0.36063	257	6.01	6.02	15.23	7.415	7.415
gi|157819845	tubulin, beta 2a [Rattus norvegicus]	66	0.937253	0.367547	226	6.98	66.6	70.34	64.04	55.73
gi|6981324	prolyl 4-hydroxylase, beta polypeptide [Rattus norvegicus]	12	1.02881	0.371871	65	21.7	21.71	24.61	22.24	22.24
gi|9971212	proliferation related acidic leucine rich protein PAL31 [Rattus norvegicus]	5	1.05384	0.373604	297	5.13	9.23	22.43	19.85	17.65
gi|81861515	RecName: Full=Grifin; AltName: Full=Galectin-related inter-fiber protein	2	4.56986	0.374716	404	3.96	3.96	27.78	15.28	15.28
gi|221222481	RecName: Full=Transcription intermediary factor 1-beta; Short=TIF1-beta; AltName: Full=Tripartite motif-containing protein 28; AltName: Full=Nuclear corepressor KAP-1; AltName: Full=KRAB-associated protein 1	4	1.05343	0.37548	214	7.54	7.54	6.467	5.03	5.03
gi|197245749	Eukaryotic translation elongation factor 1 beta 2 [Rattus norvegicus]	2	1.1213	0.376802	347	4.09	4.09	25.78	13.33	13.33
gi|157817494	phosphodiesterase 6A [Rattus norvegicus]	8	0.974613	0.377379	82	18.42	18.91	19.42	12.67	9.535
gi|197927125	galectin-related protein [Rattus norvegicus]	3	1.08757	0.378939	236	6.39	6.39	43.02	30.23	19.19
gi|6978713	crystallin, beta B2 [Rattus norvegicus]	36	5.61296	0.379963	22	38.28	38.28	94.15	89.27	89.27
gi|158706432	RecName: Full=Beta-crystallin S; AltName: Full=Gamma-crystallin S; AltName: Full=Gamma-S-crystallin	7	4.10471	0.380701	125	12.01	12.01	50	38.76	35.39
gi|77416905	RecName: Full=Ribonuclease inhibitor; AltName: Full=Ribonuclease/angiogenin inhibitor 1	2	1.06241	0.382832	311	4.8	4.8	11.62	8.772	6.579
gi|624918	SP120 [Rattus norvegicus]	12	0.934277	0.384222	73	20.03	20.04	23.56	16.04	16.04
gi|462690	RecName: Full=Nucleoside diphosphate kinase A; Short=NDP kinase A; Short=NDK A; AltName: Full=Tumor metastatic process-associated protein; AltName: Full=Metastasis inhibition factor NM23	5	0.767378	0.384236	456	2.72	8.52	48.03	36.18	30.26
gi|71043752	UMP-CMP kinase 1 [Rattus norvegicus]	2	0.916799	0.385168	359	4.01	4.01	17.62	8.811	8.811
gi|157821127	TROVE domain family, member 2 [Rattus norvegicus]	2	0.96501	0.385889	378	4	4	11.52	5.762	5.762
gi|5902791	RecName: Full=Peroxiredoxin-6; AltName: Full=Antioxidant protein 2; AltName: Full=1-Cys peroxiredoxin; Short=1-Cys PRX; AltName: Full=Acidic calcium-independent phospholipase A2; Short=aiPLA2; AltName: Full=Non-selenium glutathione peroxidase; Short=NSGPx; AltName: Full=Thiol-specific antioxidant protein	7	1.16633	0.38976	95	15.58	15.58	61.16	50.45	33.93
gi|203629	gamma-C-crystallin	5	2.61628	0.390851	203	7.91	10.64	44.25	35.63	24.71
gi|6978487	fructose-bisphosphate aldolase A [Rattus norvegicus]	26	1.14093	0.39234	14	43.56	43.56	76.92	65.38	58.79
gi|51338711	RecName: Full=Guanine nucleotide-binding protein G(I)/G(S)/G(T) subunit beta-1; AltName: Full=Transducin beta chain 1	15	0.840159	0.395714	68	21.11	21.17	37.35	26.76	26.76
gi|8393502	glutathione S-transferase mu 1 [Rattus norvegicus]	3	1.11323	0.399906	238	6.31	6.31	23.39	22.48	16.97
gi|55628	unnamed protein product [Rattus norvegicus]	26	0.884029	0.401368	15	43.48	43.48	49.18	42.93	37.99
gi|9506467	carbonyl reductase 1 [Rattus norvegicus]	2	0.93761	0.403518	341	4.19	4.19	15.52	9.386	9.386
gi|8394432	peroxiredoxin 2 [Rattus norvegicus]	7	0.884107	0.404924	197	8	10.36	27.27	27.27	27.27
gi|8394076	proteasome (prosome, macropain) subunit, alpha type 6 [Rattus norvegicus]	2	0.901509	0.406106	385	4	4	13.01	11.38	11.38
gi|905379	GABA transaminase	2	0.916059	0.406885	344	4.13	4.55	15.8	8.2	6.6
gi|109465947	PREDICTED: hypothetical protein [Rattus norvegicus]	6	0.972985	0.408676	121	12.13	12.13	14.21	12	12
gi|197927211	heterogeneous nuclear ribonucleoprotein L isoform a [Rattus norvegicus]	3	0.88737	0.409317	305	5.05	5.05	6.581	5.778	5.778
gi|641973	transitional endoplasmic reticulum ATPase	17	1.07394	0.41038	29	34.67	34.68	39.58	34.62	25.68
gi|55575	beta-actin [Rattus norvegicus]	42	0.896295	0.411174	12	45.6	45.6	56	50.67	46.93
gi|77404215	synuclein, beta [Rattus norvegicus]	10	0.935029	0.41617	102	14.5	14.5	47.76	47.76	43.28
gi|9789594	betaB3-crystallin [Rattus norvegicus]	9	3.93164	0.420136	78	19.45	19.45	69.19	61.61	56.4
gi|8394331	superoxide dismutase 2 [Rattus norvegicus]	5	1.01827	0.420255	159	10.01	10.01	32.88	28.38	28.38
gi|149033381	rCG52521, isoform CRA_a [Rattus norvegicus]	15	1.1652	0.422385	584	2	25.48	50.44	46.33	40.18
gi|66774109	RecName: Full=Beta-crystallin A3; Contains: RecName: Full=Beta-crystallin A3, isoform A1, Delta4 form; Contains: RecName: Full=Beta-crystallin A3, isoform A1, Delta7 form; Contains: RecName: Full=Beta-crystallin A3, isoform A1, Delta8 form	6	3.41024	0.424694	140	11.1	11.1	29.77	29.77	29.77
gi|149039410	rCG45400 [Rattus norvegicus]	68	0.906102	0.425227	2	69.67	69.67	68.99	65.62	61.8
gi|56929	unnamed protein product [Rattus norvegicus]	52	0.952733	0.432578	286	5.52	71.97	82.11	70.06	66.85
gi|71122313	Aldolase C, fructose-bisphosphate [Rattus norvegicus]	30	0.754169	0.436188	33	32.64	39.5	74.1	58.95	53.44
gi|203582	cholesterol-regulated protein CR39	3	1.0465	0.438313	264	6	6.01	27.33	13.08	13.08
gi|50927575	SMT3 suppressor of mif two 3 homolog 2 (S. cerevisiae) [Rattus norvegicus]	2	1.09196	0.438918	399	4	4	27.37	27.37	27.37
gi|81885266	RecName: Full=Dihydrolipoyl dehydrogenase, mitochondrial; AltName: Full=Dihydrolipoamide dehydrogenase; Flags: Precursor	4	0.907778	0.439591	189	8.2	8.22	14.93	11.39	11.39
gi|6981642	t-complex 1 [Rattus norvegicus]	2	0.979037	0.441381	327	4.34	4.85	10.07	7.014	4.496
gi|62645168	PREDICTED: similar to 40S ribosomal protein S3 [Rattus norvegicus]	2	0.945314	0.443768	411	3.7	3.7	11.11	9.053	9.053
gi|61556986	transferrin [Rattus norvegicus]	5	0.938134	0.44633	147	10.4	10.42	14.04	8.309	8.309
gi|77404380	hypoxia up-regulated 1 [Rattus norvegicus]	3	0.937485	0.448302	235	6.41	6.43	6.513	4.008	3.006
gi|3023560	RecName: Full=Beta-crystallin A4; AltName: Full=Beta-A4 crystallin	5	3.7837	0.448526	144	10.69	10.69	50.51	46.43	39.8
gi|9739217	betaB1-crystallin [Rattus norvegicus]	8	3.65401	0.449171	110	13.54	13.54	47.76	42.04	30.2
gi|20806127	interphotoreceptor matrix proteoglycan 2 [Rattus norvegicus]	5	1.1135	0.452191	137	11.32	11.33	8.232	5.488	4.278
gi|27465611	crystallin, beta A2 [Rattus norvegicus]	6	2.00774	0.452246	190	8.14	8.14	40.61	25.38	25.38
gi|2499662	RecName: Full=Rhodopsin kinase; Short=RK; AltName: Full=G protein-coupled receptor kinase 1; Flags: Precursor	6	0.88837	0.453807	126	12.01	12.01	13.65	13.48	13.48
gi|38382858	Protein disulfide isomerase family A, member 3 [Rattus norvegicus]	14	0.918786	0.456773	40	28.93	28.93	48.12	35.45	33.86
gi|62665802	PREDICTED: similar to pyridoxal (pyridoxine, vitamin B6) kinase [Rattus norvegicus]	2	0.943164	0.456926	369	4	4.05	17.31	12.18	12.18
gi|81889423	RecName: Full=Eukaryotic initiation factor 4A-II; Short=eIF-4A-II; Short=eIF4A-II; AltName: Full=ATP-dependent RNA helicase eIF4A-2	2	0.966983	0.458346	230	6.72	6.72	15.48	13.51	4.423
gi|81892734	RecName: Full=Cytosolic non-specific dipeptidase; AltName: Full=CNDP dipeptidase 2	2	1.04062	0.46186	377	4	4	12.21	6.105	6.105
gi|9798638	glyceraldehyde-3-phosphate dehydrogenase [Rattus norvegicus]	57	0.902426	0.462734	5	63.8	63.8	75.08	72.67	69.37
gi|81883214	RecName: Full=Rod outer segment membrane protein 1; Short=ROSP1	2	0.91623	0.465105	333	4.26	4.26	11.4	5.983	5.983
gi|2506256	RecName: Full=Dynactin subunit 1; AltName: Full=150 kDa dynein-associated polypeptide; AltName: Full=DAP-150; Short=DP-150; AltName: Full=p150-glued	4	1.01166	0.475783	221	7.23	7.25	10.63	4.062	4.062
gi|533124	lipid-binding protein	5	1.44683	0.477146	304	5.05	5.05	33.33	28.89	22.22
gi|7242160	nucleophosmin (nucleolar phosphoprotein B23, numatrin) [Rattus norvegicus]	3	0.968421	0.483572	233	6.43	6.43	16.78	16.78	14.73
gi|52789215	Poly(A) binding protein, cytoplasmic 1 [Rattus norvegicus]	2	1.02621	0.484829	310	4.83	4.83	14.47	5.503	3.931
gi|224471906	RecName: Full=Histidine triad nucleotide-binding protein 1; AltName: Full=Adenosine 5'-monophosphoramidase; AltName: Full=Protein kinase C inhibitor 1; AltName: Full=Protein kinase C-interacting protein 1; Short=PKCI-1; AltName: Full=17 kDa inhibitor of protein kinase C	6	0.957004	0.49177	129	11.76	11.76	57.14	51.59	51.59
gi|165970767	Peptidylprolyl cis/trans isomerase, NIMA-interacting 1 [Rattus norvegicus]	2	1.06058	0.495608	442	2.88	2.9	21.21	11.52	11.52
gi|51316134	RecName: Full=RNA-binding protein Musashi homolog 1; Short=Musashi-1	2	0.93111	0.49889	599	2	3.7	8.84	6.63	6.63
gi|537941	cytosolic NADP-dependent isocitrate dehydrogenase	4	1.13426	0.49893	184	8.46	8.59	23.19	11.84	10.14
gi|400117	RecName: Full=cAMP-dependent protein kinase type II-beta regulatory subunit	2	0.927349	0.502435	834	1	5.06	17.31	10.34	6.49
gi|483109	hemoglobin alpha-2 chain - rat (tentative sequence) (fragments)	5	0.950359	0.508636	472	2.34	8.66	35.82	32.84	20.9
gi|71795613	ribosomal protein, large P2 [Rattus norvegicus]	3	0.953391	0.508765	289	5.4	5.4	50.43	50.43	50.43
gi|37805239	Enolase 2, gamma, neuronal [Rattus norvegicus]	29	0.904511	0.509895	28	34.99	43.59	78.11	67.51	62.67
gi|8393935	peptidyl arginine deiminase, type II [Rattus norvegicus]	2	1.03438	0.510113	423	3.4	3.4	3.459	2.406	2.406
gi|61252099	RecName: Full=Spliceosome RNA helicase Bat1; AltName: Full=DEAD box protein UAP56; AltName: Full=56 kDa U2AF65-associated protein; AltName: Full=ATP-dependent RNA helicase p47	6	1.09072	0.511927	130	11.58	11.58	16.59	13.32	11.92
gi|8393864	hippocalcin-like 1 [Rattus norvegicus]	5	0.962557	0.512569	152	10.19	10.19	26.42	23.32	23.32
gi|9588100	RNA binding protein p40 AUF1 [Rattus norvegicus]	10	1.14677	0.517094	80	18.85	18.85	39.8	37.83	29.28
gi|149055045	rCG32827, isoform CRA_b [Rattus norvegicus]	3	1.02207	0.5207	255	6.02	6.02	23.83	16.41	16.41
gi|595280	Rap1b	2	1.0836	0.522722	390	4	4	19.57	7.609	7.609
gi|56585024	Phosphoglycerate kinase 1 [Rattus norvegicus]	35	0.892511	0.525096	11	46.59	46.59	70.02	63.79	62.11
gi|81883712	RecName: Full=2-oxoglutarate dehydrogenase E1 component, mitochondrial; AltName: Full=Alpha-ketoglutarate dehydrogenase; Flags: Precursor	3	1.0333	0.52638	220	7.31	8.26	13.49	7.136	3.03
gi|8393180	cytochrome c oxidase subunit IV isoform 1 [Rattus norvegicus]	4	0.815253	0.528584	211	7.7	7.7	24.85	24.85	24.85
gi|81883710	RecName: Full=Rho GDP-dissociation inhibitor 1; Short=Rho GDI 1; AltName: Full=Rho-GDI alpha	2	0.920263	0.533519	396	4	4	15.2	15.2	15.2
gi|40018566	inosine monophosphate dehydrogenase 2 [Rattus norvegicus]	2	0.943783	0.53397	600	2	3.63	8.171	3.696	3.696
gi|52001084	RecName: Full=Serine/threonine-protein phosphatase PP1-gamma catalytic subunit; Short=PP-1G; AltName: Full=Protein phosphatase 1C catalytic subunit	3	1.09075	0.534756	259	6.01	6.01	11.15	8.05	8.05
gi|81918226	RecName: Full=Tubulin beta-3 chain; AltName: Full=Neuron-specific class III beta-tubulin	48	1.15919	0.534873	127	11.95	48.34	58.89	45.78	43.78
gi|8394152	GTP-binding protein alpha o [Rattus norvegicus]	7	0.88571	0.535214	103	14.13	16.13	39.55	29.66	22.6
gi|109476698	PREDICTED: similar to SH3-domain GRB2-like 2 [Rattus norvegicus]	8	0.94326	0.536237	109	13.57	13.57	29.18	18.88	15.88
gi|62027591	Synaptic vesicle glycoprotein 2a [Rattus norvegicus]	3	0.961263	0.536279	285	5.53	5.54	8.625	5.391	5.391
gi|19424218	hepatoma-derived growth factor-related protein 2 [Rattus norvegicus]	2	1.10467	0.537307	452	2.75	4.05	8.52	4.036	2.84
gi|197384571	ubiquitin-like modifier activating enzyme 2 [Rattus norvegicus]	3	1.0193	0.537528	242	6.27	6.27	10.8	7.042	5.164
gi|81882797	RecName: Full=Cell cycle exit and neuronal differentiation protein 1	2	0.891171	0.537902	419	3.52	3.52	14.77	14.77	14.77
gi|56336	unnamed protein product [Rattus norvegicus]	5	1.14232	0.538906	163	10	10	43.81	34.76	34.76
gi|501064	immunophilin FKBP12	2	0.967699	0.540873	320	4.54	4.54	36.11	25	25
gi|81911114	RecName: Full=N(G),N(G)-dimethylarginine dimethylaminohydrolase 2; Short=Dimethylarginine dimethylaminohydrolase 2; Short=DDAH-2; AltName: Full=DDAHII; AltName: Full=Dimethylargininase-2	4	1.45062	0.541709	174	9.03	9.4	27.37	24.21	16.84
gi|91234898	84 kDa heat shock protein [Rattus norvegicus]	20	0.96213	0.542686	136	11.39	34.69	39.09	23.2	21.69
gi|33341138	guanylate kinase [Rattus norvegicus]	5	1.05697	0.544418	161	10	10.01	32.32	27.78	27.78
gi|37078084	RecName: Full=Far upstream element-binding protein 2; Short=FUSE-binding protein 2; AltName: Full=KH type-splicing regulatory protein; Short=KSRP; AltName: Full=MAP2 RNA trans-acting protein 1; Short=MARTA1	9	1.05789	0.545712	84	18.33	18.33	33.01	19.42	17.2
gi|48734832	NSFL1 (p97) cofactor (p47) [Rattus norvegicus]	3	0.966524	0.546249	232	6.47	6.47	15.14	15.14	10.54
gi|71121760	High mobility group nucleosomal binding domain 2 [Rattus norvegicus]	2	1.02955	0.547355	275	5.8	5.8	38.89	33.33	16.67
gi|157818019	splicing factor, arginine/serine-rich 1 [Rattus norvegicus]	4	1.10244	0.54823	179	8.66	8.66	25.4	17.74	17.74
gi|56541188	Calbindin 2 [Rattus norvegicus]	11	0.843246	0.549029	71	20.1	20.1	42.44	37.64	33.58
gi|51338593	RecName: Full=GTP-binding nuclear protein Ran; AltName: Full=GTPase Ran; AltName: Full=Ras-related nuclear protein; AltName: Full=Ras-like protein TC4	6	1.11635	0.553452	119	12.2	12.2	28.24	28.24	25.46
gi|203276	clathryn light chain (LCA2)	7	0.990937	0.554275	142	11.01	11.01	24.15	18.22	14.41
gi|6435548	Chain B, Crystal Structure Of A Mammalian 2-Cys Peroxiredoxin, Hbp23.	7	1.00904	0.5582	98	15.22	15.24	52.76	46.23	34.17
gi|729878	RecName: Full=Casein kinase II subunit alpha; Short=CK II	2	1.03764	0.565285	368	4	4.27	18.41	6.905	6.905
gi|8394079	proteasome (prosome, macropain) subunit, beta type 2 [Rattus norvegicus]	2	1.03799	0.566947	394	4	4	13.93	13.93	13.93
gi|55729	unnamed protein product [Rattus norvegicus]	2	0.948854	0.568489	335	4.25	4.25	8.849	2.559	2.559
gi|197313698	FK506 binding protein 2, 13kDa [Rattus norvegicus]	2	0.937387	0.570085	444	2.86	2.86	20	9.286	9.286
gi|8393296	eukaryotic translation elongation factor 2 [Rattus norvegicus]	4	0.979355	0.57108	193	8.04	8.04	13.52	7.226	7.226
gi|730110	RecName: Full=Brain acid soluble protein 1; Short=BASP1 protein; AltName: Full=Neuronal axonal membrane protein NAP-22; AltName: Full=22 kDa neuronal tissue-enriched acidic protein	6	1.24502	0.57317	131	11.56	11.56	45.45	39.09	39.09
gi|8927570	G-protein beta-2 subunit [Rattus norvegicus]	4	0.916908	0.573556	487	2.17	8.54	27.94	12.35	12.35
gi|55971	cytochrome c oxidase subunit Va preprotein [Rattus norvegicus]	8	1.19163	0.57495	134	11.44	11.44	32.88	32.88	32.88
gi|157278015	retinoschisin [Rattus norvegicus]	2	1.12235	0.57513	324	4.42	4.42	13.39	13.39	9.821
gi|58865460	poly(rC) binding protein 3 [Rattus norvegicus]	7	0.949458	0.575929	135	11.4	11.41	32.29	25.71	25.71
gi|157818299	hypothetical protein LOC307907 [Rattus norvegicus]	3	0.916795	0.578095	251	6.09	6.09	11.79	9.582	9.582
gi|8393547	heterogeneous nuclear ribonucleoprotein A1 [Rattus norvegicus]	13	0.894839	0.579138	93	15.7	21.73	45	40.63	40.63
gi|294543	dynein heavy chain	16	1.09906	0.586788	32	34.04	34.52	9.776	4.931	4.457
gi|81885359	RecName: Full=Lactoylglutathione lyase; AltName: Full=Methylglyoxalase; AltName: Full=Aldoketomutase; AltName: Full=Glyoxalase I; Short=Glx I; AltName: Full=Ketone-aldehyde mutase; AltName: Full=S-D-lactoylglutathione methylglyoxal lyase	7	1.0779	0.599616	124	12.03	12.05	46.74	34.78	34.78
gi|46397406	RecName: Full=DnaJ homolog subfamily C member 5; AltName: Full=Cysteine string protein; Short=CSP	4	0.948011	0.600442	269	6	6	28.79	28.79	28.79
gi|157822919	neutral alpha-glucosidase AB [Rattus norvegicus]	4	0.969603	0.602072	282	5.62	5.62	9.41	4.768	4.768
gi|38303969	Heat shock protein 5 [Rattus norvegicus]	15	1.0796	0.602903	74	20.01	28.03	36.24	26.61	25.08
gi|109473137	PREDICTED: similar to Heterogeneous nuclear ribonucleoprotein G (hnRNP G) (RNA-binding motif protein, X chromosome) isoform 2 [Rattus norvegicus]	2	1.10027	0.608079	379	4	4	11.34	6.576	6.576
gi|57303	sarcoplasmic reticulum 2+-Ca-ATPase [Rattus norvegicus]	2	0.942071	0.614434	382	4	4	4.012	3.21	3.21
gi|157818123	ovary-specific acidic protein [Rattus norvegicus]	2	1.11774	0.614564	360	4.01	4.01	11.15	7.914	7.914
gi|3122017	RecName: Full=Dihydropyrimidinase-related protein 1; Short=DRP-1; AltName: Full=Collapsin response mediator protein 1; Short=CRMP-1	14	0.964626	0.617244	139	11.1	19.8	24.3	19.58	19.58
gi|149059759	chaperonin subunit 8 (theta) (predicted), isoform CRA_a [Rattus norvegicus]	4	0.973328	0.622762	171	9.11	9.11	11.5	9.672	7.847
gi|16758732	reticulon 1 [Rattus norvegicus]	2	0.975386	0.625057	300	5.05	5.05	10.94	9.781	5.92
gi|8393861	hippocalcin-like 4 [Rattus norvegicus]	2	1.376	0.62531	841	0.96	4.97	27.23	19.37	8.377
gi|71043736	splicing factor 3a, subunit 3 [Rattus norvegicus]	2	0.846405	0.628568	424	3.4	3.4	6.188	5.389	5.389
gi|60391194	RecName: Full=Aconitate hydratase, mitochondrial; Short=Aconitase; AltName: Full=Citrate hydro-lyase; Flags: Precursor	17	1.04449	0.633427	39	29.4	29.88	30.9	24.49	23.97
gi|6093640	RecName: Full=Platelet-activating factor acetylhydrolase IB subunit beta; AltName: Full=PAF acetylhydrolase 30 kDa subunit; Short=PAF-AH 30 kDa subunit; AltName: Full=PAF-AH subunit beta; AltName: Full=PAFAH subunit beta; AltName: Full=Platelet-activating factor acetylhydrolase alpha 2 subunit; Short=PAF-AH alpha 2	4	0.965336	0.635501	188	8.21	8.21	29.26	27.07	27.07
gi|56090441	DEAD (Asp-Glu-Ala-Asp) box polypeptide 5 [Rattus norvegicus]	5	0.949587	0.635625	118	12.3	12.3	15.28	11.22	8.13
gi|73695330	Ap2b1 protein [Rattus norvegicus]	3	1.0401	0.641543	592	2	5.41	2.839	2.839	2.839
gi|8392878	S-adenosylhomocysteine hydrolase [Rattus norvegicus]	7	0.98657	0.64351	106	13.94	13.94	21.76	19.21	19.21
gi|81885333	RecName: Full=Seryl-tRNA synthetase, cytoplasmic; AltName: Full=Seryl-tRNA(Ser/Sec) synthetase; AltName: Full=Serine--tRNA ligase; Short=SerRS	2	0.993244	0.65479	375	4	4	7.813	4.492	4.492
gi|6981464	retinol binding protein 1, cellular [Rattus norvegicus]	4	0.963046	0.657617	272	6	6	37.78	37.78	37.78
gi|399660	aldehyde reductase [Rattus norvegicus]	3	1.01149	0.663835	254	6.02	6.04	19.08	9.846	9.846
gi|9507115	solute carrier family 1 (glial high affinity glutamate transporter), member 3 [Rattus norvegicus]	2	0.765761	0.666341	384	4	4	7.919	6.814	6.814
gi|543922	RecName: Full=Calnexin; Flags: Precursor	9	1.01088	0.668853	81	18.55	18.55	22.5	20.47	17.26
gi|189484064	septin 11 isoform IV [Rattus norvegicus]	2	0.967925	0.670992	601	2	3.57	5.412	3.765	3.765
gi|41350889	Pgam1 protein [Rattus norvegicus]	28	0.948205	0.672578	47	27.51	27.51	62.99	56.69	56.3
gi|49258798	Chain C, Crystal Structure Of Rat Alpha-Parvalbumin At 1.05 Resolution	5	0.988825	0.673382	162	10	10	66.06	54.13	54.13
gi|50927605	Suppression of tumorigenicity 13 [Rattus norvegicus]	2	0.989197	0.676364	358	4.01	4.01	9.511	5.435	5.435
gi|81884599	RecName: Full=Dynactin subunit 2	5	1.02129	0.677237	145	10.65	10.65	29.85	22.39	18.41
gi|57033190	ADP-ribosylation factor 3 [Rattus norvegicus]	2	0.968842	0.68365	383	4	4	19.89	9.392	9.392
gi|2642600	light molecular-weight neurofilament [Rattus norvegicus]	4	0.941632	0.687285	357	4.01	6.01	10.7	4.797	4.797
gi|149027214	similar to protein 4.1G (predicted), isoform CRA_c [Rattus norvegicus]	25	1.08201	0.688241	8	48.35	48.35	38.01	30.99	29.16
gi|6531681	cell division cycle 42 [Rattus norvegicus]	3	0.944428	0.688815	276	5.72	5.73	36.13	21.47	21.47
gi|51980308	Heterogeneous nuclear ribonucleoprotein A3 [Rattus norvegicus]	12	1.11528	0.693168	54	24.66	24.66	40.9	36.94	36.94
gi|157818423	heterogeneous nuclear ribonucleoprotein H3 (2H9) [Rattus norvegicus]	2	0.978343	0.693733	406	3.71	3.71	17.34	7.803	7.803
gi|8394018	protein phosphatase 2a, catalytic subunit, alpha isoform [Rattus norvegicus]	3	0.926289	0.695844	248	6.11	6.11	21.68	14.56	14.56
gi|66773787	RecName: Full=40 kDa peptidyl-prolyl cis-trans isomerase; Short=PPIase; Short=Rotamase; AltName: Full=Cyclophilin-40; Short=CYP-40	4	0.982829	0.696809	202	8	8	10.81	10.81	10.81
gi|8393696	stathmin 1 [Rattus norvegicus]	6	0.984242	0.69867	117	12.56	12.57	49.66	42.28	34.23
gi|42476181	malate dehydrogenase, mitochondrial [Rattus norvegicus]	13	1.03059	0.702917	58	22.97	23.45	50.59	39.94	36.39
gi|733121	opsin	3	1.04657	0.704397	240	6.3	6.3	7.759	7.759	5.172
gi|158187544	brain glycogen phosphorylase [Rattus norvegicus]	7	1.08361	0.706549	104	14.08	14.09	18.27	8.422	8.422
gi|157818175	ubiquilin 2 [Rattus norvegicus]	2	0.970459	0.706992	364	4	5.1	6.583	6.583	5.643
gi|81910860	RecName: Full=Heterogeneous nuclear ribonucleoprotein H2; Short=hnRNP H2; AltName: Full=Heterogeneous nuclear ribonucleoprotein H'; Short=hnRNP H'	4	0.96558	0.707313	172	9.1	9.1	18.71	14.92	11.14
gi|62296810	RecName: Full=Protein disulfide-isomerase A6; AltName: Full=Protein disulfide isomerase P5; AltName: Full=Calcium-binding protein 1; Short=CaBP1; AltName: Full=Thioredoxin domain-containing protein 7; Flags: Precursor	5	0.98097	0.707583	164	10	10	16.59	16.59	16.59
gi|68534712	Hypoxanthine phosphoribosyltransferase 1 [Rattus norvegicus]	8	1.04606	0.709091	90	16.35	16.35	50.46	39.45	39.45
gi|6978499	acidic (leucine-rich) nuclear phosphoprotein 32 family, member A [Rattus norvegicus]	15	0.900965	0.715304	53	24.97	24.97	45.34	40.49	36.44
gi|56388799	Ckb protein [Rattus norvegicus]	47	0.878621	0.715826	13	44.93	44.93	77.21	71.08	66.42
gi|8393962	phosphatidylinositol transfer protein [Rattus norvegicus]	2	0.979713	0.724141	395	4	4	5.166	5.166	5.166
gi|38197650	Hnrpk protein [Rattus norvegicus]	10	0.983391	0.724316	83	18.34	18.34	33.84	29.31	29.31
gi|223718723	cytochrome c oxidase, subunit VIb polypeptide 1 [Rattus norvegicus]	4	0.906725	0.725234	223	7.15	7.15	53.49	53.49	40.7
gi|56383	heat shock protein (hsp60) precursor [Rattus norvegicus]	7	1.03452	0.725405	111	13.4	13.4	26.53	15.36	15.36
gi|55716047	ATPase, H transporting, lysosomal V1 subunit B2 [Rattus norvegicus]	11	0.945271	0.729007	69	20.51	20.51	37.96	27.59	24.85
gi|77917614	dynamin 1-like [Rattus norvegicus]	2	0.985135	0.73578	331	4.3	4.32	9.777	3.911	3.911
gi|8810245	voltage-dependent anion channel 1 [Rattus norvegicus]	6	0.878663	0.739095	113	12.89	12.89	23.32	23.32	23.32
gi|81889667	RecName: Full=Ubiquitin-like modifier-activating enzyme 1; AltName: Full=Ubiquitin-activating enzyme E1	16	1.04224	0.740809	43	28.28	28.45	18.53	17.86	17.39
gi|149025655	glutathione S-transferase, mu type 3, isoform CRA_b [Rattus norvegicus]	4	0.983633	0.743546	186	8.32	8.32	33.05	23.73	19.92
gi|6093900	RecName: Full=Ras-related protein Rab-3B	2	1.04669	0.745966	594	2	4.09	23.74	14.16	14.16
gi|202837	aldolase A	26	1.05937	0.746735	582	2	43.56	75	65.38	58.79
gi|3122037	RecName: Full=Dihydropyrimidinase-related protein 4; Short=DRP-4; AltName: Full=Collapsin response mediator protein 3; Short=CRMP-3; AltName: Full=UNC33-like phosphoprotein 4; Short=ULIP4 protein	17	1.0604	0.752945	55	24.46	27.19	35.99	34.04	32.09
gi|77417616	RecName: Full=Ubiquitin-conjugating enzyme E2 N; AltName: Full=Ubiquitin-protein ligase N; AltName: Full=Ubiquitin carrier protein N; AltName: Full=Bendless-like ubiquitin-conjugating enzyme	2	0.978596	0.753313	350	4.05	4.05	33.55	19.74	19.74
gi|56737	unnamed protein product [Rattus norvegicus]	11	1.09183	0.755785	59	22.97	22.97	18.88	16.78	16.08
gi|157821865	hypothetical protein LOC499657 [Rattus norvegicus]	2	0.958533	0.760958	697	2	2	25.27	12.09	12.09
gi|93279422	Chain A, Rat Liver F1-Atpase	9	0.877676	0.76341	97	15.36	15.37	32.75	21.57	14.9
gi|81882798	RecName: Full=V-type proton ATPase subunit C 1; Short=V-ATPase subunit C 1; AltName: Full=Vacuolar proton pump subunit C 1	4	0.987014	0.763413	169	9.19	9.2	15.71	11.52	9.686
gi|6981022	hexokinase 1 [Rattus norvegicus]	10	1.21289	0.764159	60	22.64	22.64	21.35	16.34	10.89
gi|71896616	S-antigen; retina and pineal gland (arrestin) [Rattus norvegicus]	34	1.08319	0.77409	21	39.34	39.37	52.61	46.65	46.65
gi|56605666	proteasome (prosome, macropain) 26S subunit, non-ATPase, 3 [Rattus norvegicus]	2	0.942979	0.774301	417	3.52	3.55	7.736	5.472	5.472
gi|584774	RecName: Full=ADP-ribosylation factor-like protein 3; AltName: Full=ARD3	3	1.01543	0.774662	192	8.11	8.11	37.91	34.62	20.88
gi|83305118	RecName: Full=NADH dehydrogenase [ubiquinone] flavoprotein 2, mitochondrial; AltName: Full=NADH-ubiquinone oxidoreductase 24 kDa subunit; Flags: Precursor	4	1.05903	0.779958	191	8.14	8.14	24.6	21.77	21.77
gi|209862801	alanyl-tRNA synthetase [Rattus norvegicus]	2	1.01541	0.785539	294	5.23	5.23	5.888	3.512	2.789
gi|149064296	rCG46767, isoform CRA_c [Rattus norvegicus]	4	0.933633	0.786145	195	8.01	8.01	13.29	9.029	9.029
gi|54036435	RecName: Full=Stress-induced-phosphoprotein 1; Short=STI1; AltName: Full=Hsc70/Hsp90-organizing protein; Short=Hop	2	0.96648	0.789958	293	5.24	5.24	17.68	4.604	3.683
gi|72679585	Histone cluster 1, H4b [Rattus norvegicus]	3	0.869503	0.796268	258	6.01	6.01	35.92	29.13	29.13
gi|190359305	RecName: Full=Elongation factor Tu, mitochondrial; Flags: Precursor	2	1.01358	0.800211	422	3.4	3.41	9.513	6.858	6.858
gi|75991707	destrin [Rattus norvegicus]	2	0.977995	0.807016	309	4.87	4.88	32.73	13.94	9.697
gi|66911068	Pcbp2 protein [Rattus norvegicus]	7	0.983539	0.811492	408	3.7	11.11	22.99	21.49	21.49
gi|81910374	RecName: Full=T-complex protein 1 subunit beta; Short=TCP-1-beta; AltName: Full=CCT-beta	3	0.964188	0.812975	228	6.86	6.86	16.26	11.21	9.159
gi|83320094	far upstream element (FUSE) binding protein 1 [Rattus norvegicus]	5	1.01108	0.816834	262	6	10.01	11.89	8.138	6.103
gi|149044856	spectrin beta 2, isoform CRA_a [Rattus norvegicus]	6	1.04764	0.826387	108	13.69	14.2	9.014	4.909	3.005
gi|57032815	Glycoprotein m6a [Rattus norvegicus]	2	0.978377	0.827208	782	1.52	1.52	6.475	5.036	5.036
gi|226486	rab1B protein	2	0.983548	0.827956	374	4	4.01	18.41	16.42	16.42
gi|197927441	heat shock protein 4 like [Rattus norvegicus]	5	0.974162	0.828555	150	10.29	10.29	17.42	9.308	7.637
gi|54673763	Heat shock protein 90, alpha (cytosolic), class A member 1 [Rattus norvegicus]	38	0.947537	0.830434	6	60.4	60.4	44.47	35.33	33.83
gi|157819953	ATPase, H+ transporting, lysosomal V1 subunit A [Rattus norvegicus]	9	0.957513	0.830801	89	16.53	16.53	22.85	13.94	11.67
gi|60678254	creatine kinase, mitochondrial 1, ubiquitous [Rattus norvegicus]	2	1.0168	0.834145	366	4	4.64	21.29	9.569	8.134
gi|157786744	dihydropyrimidinase-like 2 [Rattus norvegicus]	25	0.953063	0.834195	27	35.14	35.63	48.6	41.78	38.99
gi|56346	H2B histone [Rattus norvegicus]	3	1.07633	0.834786	250	6.09	6.09	38.4	21.6	21.6
gi|61889073	matrin 3 [Rattus norvegicus]	5	1.01594	0.840994	166	9.77	9.77	13.25	8.166	8.166
gi|8515422	NEFA precursor [Rattus norvegicus]	2	0.985442	0.845727	367	4	4.48	11.19	6.19	5.238
gi|149038699	hexokinase 1, isoform CRA_i [Rattus norvegicus]	10	1.02409	0.847842	585	2	21.49	22.03	16.46	11.5
gi|149067089	ATPase, Ca++ transporting, plasma membrane 1, isoform CRA_b [Rattus norvegicus]	2	0.979822	0.850257	340	4.19	4.69	7.131	2.623	2.295
gi|205374	metalloendopeptidase	3	0.99006	0.856656	292	5.24	5.27	14.26	5.271	5.271
gi|32469607	RecName: Full=E3 ubiquitin-protein ligase NEDD4	5	0.990857	0.857663	148	10.37	10.37	11.39	8.681	7.215
gi|8393101	cofilin 1 [Rattus norvegicus]	9	1.06676	0.858867	79	18.92	18.92	69.88	59.04	54.22
gi|187469483	LUC7-like 2 (S. cerevisiae) [Rattus norvegicus]	3	0.987941	0.863656	253	6.02	6.98	15.31	7.653	6.122
gi|52783577	RecName: Full=Dynein light chain 1, cytoplasmic; AltName: Full=Dynein light chain LC8-type 1; AltName: Full=8 kDa dynein light chain; AltName: Full=DLC8; AltName: Full=Protein inhibitor of neuronal nitric oxide synthase; Short=PIN	2	1.00753	0.874659	323	4.44	4.44	32.58	26.97	14.61
gi|71681130	ATP synthase, H+ transporting, mitochondrial F1 complex, beta polypeptide [Rattus norvegicus]	23	1.06306	0.876807	30	34.27	34.28	50.28	41.59	37.05
gi|71680955	Acly protein [Rattus norvegicus]	3	0.991604	0.880583	284	5.58	5.58	11	5.5	3.483
gi|149060971	vacuolar ATPase subunit H, isoform CRA_a [Rattus norvegicus]	3	0.986989	0.882025	322	4.45	4.45	10.77	8.696	7.453
gi|74355722	Capping protein (actin filament) muscle Z-line, alpha 2 [Rattus norvegicus]	4	1.00878	0.883918	247	6.14	6.14	16.78	14.34	12.24
gi|7709992	basigin isoform 2 [Rattus norvegicus]	3	1.02377	0.885649	278	5.71	5.71	18.38	15.44	15.44
gi|56090293	pyruvate dehydrogenase (lipoamide) beta [Rattus norvegicus]	3	1.03667	0.885838	288	5.4	5.4	15.32	10.86	10.86
gi|209413774	guanine nucleotide binding protein, gamma transducing activity polypeptide 1 [Rattus norvegicus]	8	0.967597	0.889869	132	11.54	11.54	83.78	56.76	56.76
gi|224493240	RecName: Full=Heterogeneous nuclear ribonucleoproteins A2/B1; Short=hnRNP A2 / hnRNP B1	15	1.02865	0.890693	51	25.48	25.48	49.86	45.89	39.94
gi|149064440	rCG46917, isoform CRA_a [Rattus norvegicus]	2	0.990896	0.891522	308	4.89	5.37	20.77	20.77	13.53
gi|6978547	Na+/K+ -ATPase alpha 3 subunit [Rattus norvegicus]	15	0.966615	0.89356	37	29.95	29.97	27.84	19.64	17.77
gi|8393896	protein kinase C and casein kinase substrate in neurons 1 [Rattus norvegicus]	11	0.966241	0.894512	67	21.43	21.43	44.67	31.97	23.81
gi|6978543	Na+/K+ -ATPase alpha 1 subunit [Rattus norvegicus]	11	1.02004	0.895199	216	7.39	21.52	19.26	12.32	11.34
gi|599963	mitochondrial oxidative phosphorylation coupling factor 6 [Rattus norvegicus]	2	0.965897	0.896196	414	3.58	3.58	27.78	27.78	27.78
gi|109507479	PREDICTED: similar to complexin 4 [Rattus norvegicus]	2	0.9797	0.900383	316	4.64	4.64	29.26	17.41	17.41
gi|56388751	ADP-ribosylation factor 5 [Rattus norvegicus]	2	0.985343	0.905805	758	1.7	3.7	25	9.444	9.444
gi|81910540	RecName: Full=CaM kinase-like vesicle-associated protein; AltName: Full=1G5	2	1.01268	0.907346	381	4	4	10.32	6.151	6.151
gi|71534276	GDP dissociation inhibitor 1 [Rattus norvegicus]	14	1.01486	0.910226	75	19.93	19.93	35.35	25.73	25.73
gi|149033670	heterogeneous nuclear ribonucleoprotein C, isoform CRA_b [Rattus norvegicus]	2	1.01595	0.911217	337	4.25	4.25	13.99	7.85	7.85
gi|8393381	glucose-6-phosphate dehydrogenase [Rattus norvegicus]	3	1.00466	0.913496	243	6.24	6.37	7.767	4.466	4.466
gi|9506411	ATP synthase, H+ transporting, mitochondrial F0 complex, subunit d [Rattus norvegicus]	2	1.01133	0.914927	441	2.92	2.92	16.15	16.15	16.15
gi|9506497	clathrin, heavy chain (Hc) [Rattus norvegicus]	28	1.0146	0.915375	9	47.06	47.06	23.04	17.91	15.88
gi|205690878	RecName: Full=F-actin-capping protein subunit alpha-1; AltName: Full=CapZ alpha-1	3	0.981035	0.915439	588	2	6.47	16.08	16.08	12.24
gi|81883702	RecName: Full=Receptor expression-enhancing protein 6; AltName: Full=Polyposis locus protein 1-like 1	3	0.966987	0.91594	210	7.71	7.71	30.33	27.96	19.43
gi|45478134	LRRGT00147 [Rattus norvegicus]	7	1.01665	0.916381	116	12.64	13.15	14.7	11.57	10.11
gi|9507159	synapsin I isoform a [Rattus norvegicus]	3	1.00338	0.917018	239	6.3	6.3	8.097	8.097	6.96
gi|186659521	coiled-coil domain containing 72 [Rattus norvegicus]	3	0.984584	0.921977	217	7.37	7.37	68.75	37.5	28.13
gi|6822251	Nogo-C protein [Rattus norvegicus]	4	0.978231	0.924454	757	1.7	5.71	19.1	13.57	13.57
gi|62461577	visinin-like 1 [Rattus norvegicus]	3	0.994782	0.924892	361	4	6.2	22.51	14.66	14.66
gi|149065924	DEAD (Asp-Glu-Ala-Asp) box polypeptide 17, isoform CRA_a [Rattus norvegicus]	4	0.99149	0.926552	329	4.33	9.41	16.26	9.049	5.982
gi|50927657	ATPase, Na+/K+ transporting, beta 1 polypeptide [Rattus norvegicus]	2	0.992038	0.928721	365	4	4.78	11.18	9.868	8.224
gi|9955918	MLGAPC core protein [Rattus norvegicus]	7	0.983276	0.931875	128	11.88	12.05	10.15	7.895	6.767
gi|8394502	ubiquitin C [Rattus norvegicus]	5	1.02401	0.932203	182	8.54	8.54	58.89	57.53	50.12
gi|755493	rbSec1B	12	0.986523	0.932317	70	20.46	20.48	29.35	26.04	23.05
gi|205829267	RecName: Full=Ubiquitin thioesterase OTUB1; AltName: Full=Otubain-1; AltName: Full=OTU domain-containing ubiquitin aldehyde-binding protein 1; AltName: Full=Ubiquitin-specific-processing protease OTUB1; AltName: Full=Deubiquitinating enzyme OTUB1	3	1.00532	0.935819	237	6.32	6.32	22.51	16.97	14.76
gi|81916316	RecName: Full=Thioredoxin-like protein 1; AltName: Full=Thioredoxin-related protein	2	1.00349	0.940802	415	3.53	3.53	12.8	6.228	6.228
gi|6981600	syntaxin 1B2 [Rattus norvegicus]	2	0.989446	0.945407	328	4.34	4.34	14.24	7.986	7.986
gi|6981146	L-lactate dehydrogenase B [Rattus norvegicus]	4	0.996224	0.949846	204	7.86	11.74	32.04	22.16	9.581
gi|62661459	PREDICTED: similar to Apoptotic chromatin condensation inducer in the nucleus (Acinus) [Rattus norvegicus]	2	0.995833	0.949867	353	4.02	4.02	3.585	2.166	2.166
gi|49065780	RecName: Full=26S protease regulatory subunit 4; AltName: Full=P26s4; AltName: Full=Proteasome 26S subunit ATPase 1	2	0.997236	0.950664	345	4.13	4.29	11.36	4.773	4.773
gi|5690429	cytosolic branch chain aminotransferase BCATc [Rattus norvegicus]	3	1.004	0.951804	231	6.57	6.57	13.81	12.71	8.564
gi|728810	RecName: Full=ADP/ATP translocase 2; AltName: Full=Adenine nucleotide translocator 2; Short=ANT 2; AltName: Full=ADP,ATP carrier protein 2; AltName: Full=Solute carrier family 25 member 5	2	1.01173	0.952508	312	4.78	4.78	14.43	9.732	6.376
gi|38197390	Glutamic-oxaloacetic transaminase 1, soluble (aspartate aminotransferase 1) [Rattus norvegicus]	21	1.00646	0.962868	34	31.9	31.9	52.06	45.28	41.4
gi|71051777	Heat shock protein 8 [Rattus norvegicus]	52	0.993662	0.964062	3	69.23	69.23	58.05	53.25	50.62
gi|81861572	RecName: Full=Malate dehydrogenase, cytoplasmic; AltName: Full=Cytosolic malate dehydrogenase	14	0.988878	0.964395	64	21.82	21.82	41.62	38.02	38.02
gi|45478224	LRRGT00192 [Rattus norvegicus]	4	1.00599	0.966364	181	8.6	8.81	26.35	18.24	18.24
gi|77748365	Similar to Microtubule-associated protein RP/EB family member 2 (APC-binding protein EB2) (End-binding protein 2) (EB2) [Rattus norvegicus]	2	1.00231	0.970311	388	4	4	7.362	4.294	4.294
gi|56541234	Ubiquitin-conjugating enzyme E2 variant 2 [Rattus norvegicus]	2	0.998576	0.970886	351	4.05	4.05	18.62	13.79	13.79
gi|34849861	Cox6c protein [Rattus norvegicus]	2	1.00878	0.971156	402	4	4	21.05	21.05	21.05
gi|81910761	RecName: Full=T-complex protein 1 subunit epsilon; Short=TCP-1-epsilon; AltName: Full=CCT-epsilon	3	1.00137	0.973794	279	5.7	6.18	9.057	6.47	5.73
gi|6911221	CArG-binding factor A [Rattus norvegicus]	6	0.997225	0.976722	115	12.7	13	31.58	27.02	23.86
gi|50927311	Nuclear casein kinase and cyclin-dependent kinase substrate 1 [Rattus norvegicus]	3	0.987863	0.9798	400	4	4	8.23	8.23	8.23
gi|73919859	RecName: Full=Transcription elongation factor A protein 1; AltName: Full=Transcription elongation factor S-II protein 1	2	1.00114	0.979803	372	4	4.02	14.29	9.302	9.302
gi|157819971	ubiquitin specific peptidase 5 [Rattus norvegicus]	2	1.00107	0.982503	336	4.25	4.25	5.245	2.797	2.797
gi|8394513	UNC-119 homolog [Rattus norvegicus]	2	1.00089	0.986844	349	4.05	4.05	25	12.92	12.92
gi|149041605	neural cell adhesion molecule 1, isoform CRA_a [Rattus norvegicus]	10	0.995949	0.986972	586	2	20.97	13.57	12.29	11.7
gi|56404680	RecName: Full=Protein DJ-1; AltName: Full=Parkinson disease protein 7 homolog; AltName: Full=Contraception-associated protein 1; Short=Protein CAP1; AltName: Full=Fertility protein SP22	6	1.00207	0.991164	112	13.1	13.1	42.33	42.33	38.62
gi|8392872	adaptor-related protein complex 1, beta 1 subunit [Rattus norvegicus]	4	1.00029	0.991917	227	6.92	6.92	4.742	3.688	3.688
gi|77539778	alpha actinin 4 [Rattus norvegicus]	4	1.00034	0.99266	175	8.99	9.01	18.99	6.367	5.159
gi|68051990	RecName: Full=Hepatoma-derived growth factor-related protein 3; Short=HRP-3	2	1.00055	0.995502	602	2	3.3	11.88	11.88	11.88
gi|149062046	splicing factor 3b, subunit 2 (predicted), isoform CRA_a [Rattus norvegicus]	2	0.999714	0.996905	298	5.09	5.1	8.2	3.189	2.506
gi|84028215	RecName: Full=6-phosphofructokinase type C; AltName: Full=Phosphofructokinase 1; AltName: Full=Phosphohexokinase; AltName: Full=Phosphofructo-1-kinase isozyme C; Short=PFK-C	2	1.00015	0.997666	346	4.11	4.11	8.883	4.061	4.061
